# Supplementary material for: Hydrological and ecological controls on dissolved carbon concentrations in groundwater and carbon export to surface waters in a temperate pine forest watershed
Source: Copernicus journal article supplement (doi:10.5194/bg-2017-90), 2017-04-12
Supplement: Supplementary file [file bg-2017-90-AC3-supplement.pdf]

1 **Carbon dioxide degassing at the groundwater-stream-atmosphere interface:**  
2 **isotopic equilibration and hydrological mass balance in a sandy watershed**

3

4 Loris Deirmendjian<sup>1</sup> and Gwenaël Abril<sup>1, 2, \*</sup>

5

6 <sup>1</sup>Laboratoire Environnements et Paléoenvironnements Océaniques et Continentaux  
7 (EPOC), CNRS, Université de Bordeaux, Allée Geoffroy Saint-Hilaire, 33615 Pessac  
8 Cedex France.

9 <sup>2</sup>Departamento de Geoquímica, Universidade Federal Fluminense, Outeiro São João  
10 Batista s/n, 24020015, Niterói, RJ, Brazil.

11 \*Now also at Laboratoire d'Océanographie et du Climat, Expérimentations et  
12 Approches Numériques (LOCEAN), Centre IRD France-Nord, 32, Avenue Henri  
13 Varagnat, F-93143 Bondy, France

14

15 Correspondence to Gwenaël Abril ([g.abril@epoc.u-bordeaux1.fr](mailto:g.abril@epoc.u-bordeaux1.fr))

16

17

18 **Abstract**

19 Streams and rivers emit significant amounts of CO<sub>2</sub> and constitute a preferential  
20 pathway of carbon from terrestrial ecosystems to the atmosphere. However, the  
21 estimation of CO<sub>2</sub> degassing based on water-air CO<sub>2</sub> gradient, gas transfer velocity  
22 and streams surface area, is subject to large uncertainties. Furthermore, the isotopic  
23 signature of DIC in streams is strongly impacted by gas exchange, which makes it a  
24 useful tracer of CO<sub>2</sub> degassing, under some specific conditions. For this study, we  
25 characterize annual transfers of dissolved inorganic carbon (DIC) along the  
26 groundwater-stream-river continuum based on DIC concentrations, isotopic  
27 composition and measurements of stream discharges. We selected as a study site a  
28 homogeneous, forested and sandy lowland watershed (Leyre River), where  
29 hydrology occurs almost exclusively through drainage of groundwater (no surface  
30 runoff). We observed a first general spatial pattern of pCO<sub>2</sub> and DIC decrease and  
31 δ<sup>13</sup>C-DIC increase from groundwater to stream orders 1 and 2, which was due to a  
32 faster degassing of groundwater <sup>12</sup>C-DIC compared to <sup>13</sup>C-DIC, as verified  
33 experimentally. This downstream enrichment in <sup>13</sup>C-DIC could be modelled by simply  
34 considering the isotopic equilibration of groundwater-derived DIC with the  
35 atmosphere while CO<sub>2</sub> degassing. A second spatial pattern occurred between stream  
36 orders 2 and 4, consisting in an increase in the proportion of carbonate alkalinity to  
37 the DIC accompanied with enrichment in <sup>13</sup>C in stream DIC, was due to the  
38 occurrence of carbonates rocks weathering downstream. We could separate the  
39 contribution of these two processes (gas exchange and carbonates weathering) in  
40 the stable isotope budget of the river network. Thereafter, we build a hydrological  
41 mass-balance based on drainage factors and the relative contribution of groundwater  
42 in streams of increasing orders. After combining with dissolved CO<sub>2</sub> concentrations,  
43 we quantify CO<sub>2</sub> degassing in each stream orders for the whole watershed. About 75  
44 % of the total CO<sub>2</sub> degassing from the watershed occurs in first and second order  
45 streams. Furthermore, from stream orders 2 to 4, our CO<sub>2</sub> degassing fluxes compared  
46 well with those based on stream hydraulic geometry, water pCO<sub>2</sub>, gas transfer  
47 velocity, and stream surface area. In first order streams however, our approach gave  
48 CO<sub>2</sub> fluxes twice larger, suggesting a fraction of degassing occurred as hotspots at  
49 the vicinity of groundwater resurgence and was missed by conventional stream  
50 sampling.

51 **Keywords:** River systems, headwaters, carbon stable isotopes, CO<sub>2</sub> evasion,

52 hotspot

53

## 54 **1. Introduction**

55 River networks have been recognized as an important component of the global  
56 carbon cycle. Indeed, world rivers transport yearly 0.9 Pg C from the continent to the  
57 ocean (Meybeck, 1982). This number based on a carbon concentration at various  
58 river mouths worldwide (Martin and Meybeck, 1979; Meybeck, 1981), corresponds to  
59 the global continental C input to estuarine and coastal systems (Borges, 2005).  
60 However, streams, lakes and rivers do not only act as a passive pipe that delivers  
61 terrestrial carbon to the ocean, but also as sites of CO<sub>2</sub> evasion to the atmosphere  
62 (Cole et al., 2007). Indeed, riverine waters are generally supersaturated in CO<sub>2</sub>  
63 compared to the overlying atmosphere, and this water-air gradient leads to CO<sub>2</sub>  
64 degassing (Frankignoulle et al., 1996; Cole et al. 2007). At the global scale, a recent  
65 estimate of CO<sub>2</sub> degassing in streams and rivers is 1.8 Pg C yr<sup>-1</sup> (Raymond et al.,  
66 2013). This degassing flux is of the same order of magnitude as the net global CO<sub>2</sub>  
67 uptake by the terrestrial biosphere (Ciais et al., 2013) . In addition, the amount of  
68 carbon that originally leaves the terrestrial biosphere is much larger than the amount  
69 of terrestrial carbon that ultimately reaches the ocean (Cole et al., 2007).

70 The CO<sub>2</sub> dissolved in riverine waters originates from two different sources and  
71 processes (Hotchkiss et al., 2015): it can be (1) internal, i.e. resulting from  
72 heterotrophic decomposition and photo-oxidation of organic matter in the aquatic  
73 system itself or (2) external, i.e. resulting from inputs of groundwater enriched in CO<sub>2</sub>,  
74 which comes from plant roots respiration and from microbial respiration of terrestrial  
75 organic matter in soils and groundwaters. However, sources of and processes  
76 controlling CO<sub>2</sub> emissions change with the size of streams and rivers (Hotchkiss et  
77 al., 2015). In headwaters (small streams), degassing is mainly of external origin and  
78 thus largely dependent on groundwater inputs and the catchment characteristics  
79 including lithology, topography, soil types, climate and vegetation (Lauerwald et al.,  
80 2013; Polsenaere et al., 2013). As stream orders and river discharge increase, soil  
81 and groundwater CO<sub>2</sub> inputs become less significant compared to internal CO<sub>2</sub>  
82 production. Hence, in larger rivers, internal processes become a more significant  
83 source of CO<sub>2</sub> degassing (Hotchkiss et al., 2015), but still based on terrestrial organic  
84 carbon losses (Cole and Caraco, 2001). Moreover, several studies on headwaters  
85 have been conducted in temperate (Butman and Raymond, 2011; Polsenaere and  
86 Abril 2012), boreal (Wallin et al., 2013; Kokic et al., 2015) and tropical (Johnson et

87 al., 2008; Davidson et al., 2010) ecosystems, at different spatial scales. These works  
88 converged to the same conclusion that headwaters are hotspots of CO<sub>2</sub> degassing,  
89 i.e., as regions that exhibit disproportionately high reaction rates relative to the  
90 surrounding area (Vidon et al., 2010). However, this hotspot character makes difficult  
91 a precise quantification of CO<sub>2</sub> evasion based on the water-air CO<sub>2</sub> gradient, the gas  
92 transfer velocity and the water surface area. Indeed, the two latter parameters are  
93 sometimes difficult to quantify accurately in headwaters (Raymond et al., 2012).

94

95 Dissolved Inorganic Carbon (DIC) in river systems includes not only dissolved CO<sub>2</sub>  
96 (CO<sub>2</sub>\*), but also carbonates and bicarbonates ions, generally quantified by alkalinity  
97 titrations assuming that Total Alkalinity (TA) is in majority carbonate alkalinity. TA  
98 originates from atmospheric CO<sub>2</sub> through the process of weathering of carbonates,  
99 silicates as well as other rocks (Meybeck, 1987; Amiotte-Suchet et al., 2003; Cai et  
100 al., 2008). Stable isotope composition of DIC ( $\delta^{13}\text{C-DIC}$ ) is both controlled by the  
101 signature of the carbon sources and the in-stream fractionating processes that  
102 change the  $\delta^{13}\text{C}$  signature downstream (Brunet et al., 2005; Doctor et al., 2008;  
103 Polsenaere and Abril, 2012). On the one hand, oxidation of terrestrial organic matter  
104 liberates DIC with a quiet negative  $\delta^{13}\text{C}$  signal, close to that of the dominating plants  
105 and soils in the watershed, i.e., between -22 and -34 ‰ for C<sub>3</sub> plants and -12 to -16  
106 ‰ for C<sub>4</sub> plants (Vogel et al., 1993). In the other hand, weathering of carbonates  
107 rocks and minerals which have a  $\delta^{13}\text{C}$  of about 0 ‰ (Clark and Fritz, 1997) makes  
108  $\delta^{13}\text{C}$  value of the DIC less negative. In addition, gas exchange along river courses  
109 increases the  $\delta^{13}\text{C}$  signal of the DIC downstream because atmospheric CO<sub>2</sub> have  
110  $\delta^{13}\text{C}$  of about -7.5 ‰ (Keeling et al., 1984), making degassing of <sup>12</sup>CO<sub>2</sub> faster than  
111 that of <sup>13</sup>CO<sub>2</sub> (Polsenaere and Abril, 2012; Venkiteswaran et al., 2014). Thus, in  
112 aquatic systems with a limited amount of well identified carbon sources, and where  
113 fractionation factors can be calculated as the case for gas exchange, the origin and  
114 cycling of riverine DIC can be traced with  $\delta^{13}\text{C-DIC}$ . In the case of headwaters, the  
115 isotopic signature of DIC is particularly useful, as it is governed by three major  
116 processes: input of <sup>13</sup>C depleted carbon from soils in majority as dissolved CO<sub>2</sub>,  
117 eventually some inputs of <sup>13</sup>C enriched carbon from carbonates weathering in the  
118 form of alkalinity, and isotopic equilibration with the atmosphere induced by gas  
119 exchange (Polsenaere and Abril, 2012; Venkiteswaran et al., 2014).

120 In this study, we first focus on the link between CO<sub>2</sub> degassing and the isotopic  
121 signature of DIC along the groundwater-stream-river continuum. We selected as  
122 study site a small lowland temperate catchment, which offers the convenience of low  
123 slopes, a relatively homogeneous lithology (sands) and vegetation (pine forest), as  
124 well as a simple hydrological functioning mainly as groundwater drainage (no surface  
125 runoff). We couple isotopic models with experimental and *in situ* measurements to  
126 understand the dynamic of CO<sub>2</sub> degassing at two different scales (groundwater-  
127 stream interface and watershed). Our isotopic model quantitatively explains the  
128 relative importance of isotopic equilibration with the atmosphere and soil and  
129 carbonates rocks contributions to the DIC along the river continuum. We demonstrate  
130 that when drainage predominates, groundwaters and streams sampling can be  
131 coupled to discharge measurements to quantify CO<sub>2</sub> degassing, avoiding the  
132 necessity of assuming or measuring a gas transfer velocity and a water surface area,  
133 two parameters difficult to quantify and subject to a large variability at regional and  
134 global scales.

135

## 136 2. Material and Methods

### 137 2.1. Study site

138 The Leyre watershed is located in the southwestern part of France near Bordeaux  
139 and has a surface area of 2,100 km<sup>2</sup>. The Leyre River flows 115 km northwest before  
140 reaching the Arcachon Lagoon (Fig. 1). The Leyre catchment is a very flat coastal  
141 plain with a mean slope lower than 1.25 ‰ and a mean altitude lower than 50 m  
142 (Jolivet et al., 2007). The lithology is relatively homogeneous and constituted of  
143 different sandy permeable surface layers dating from the Plio-quadernary period  
144 (Legigan, 1979) (Fig. 1). However, some sandy carbonated outcrops dating from the  
145 Miocene era are present locally (Fig. 1). The region was a vast wetland until the XIX<sup>th</sup>  
146 century, when a wide forest of maritime pine (*Pinus pinaster*) was sown following  
147 landscape drainage from 1,850. Nowadays, the catchment is mainly occupied by pine  
148 forest (about 84 %), with a modest proportion of croplands (about 14 %). The climate  
149 is oceanic with mean annual air temperature of 13°C and mean annual precipitation  
150 of 930 mm (Moreaux et al., 2011). Moreover, the average annual evapotranspiration  
151 is in the range of 234-570 and 63-800 mm, respectively for maritime pine and  
152 cropland (Govind et al., 2012). Owing to the low slope (i.e., < 1.25 ‰) and the high  
153 permeability (i.e., overall hydraulic conductivity is about 10<sup>-4</sup> m s<sup>-1</sup>, Corbier et al.,  
154 2010) of the soil, surface runoff cannot take place in the Leyre watershed, and thus  
155 the excess of rainfall percolates into the soil and supports the enrichment of carbon in  
156 groundwater. The soil permeability, the vegetation and the climate turn soils into  
157 podzols with an extremely coarse texture (Augusto et al., 2010). These podzols are  
158 characterized by a low pH (~4), low organic nutrient availability, and high organic  
159 carbon content that can reach 55 g per kg of soil (Jolivet et al., 2007). The sandy  
160 permeable surface layers contain a free and continuous groundwater table strongly  
161 interconnected with the superficial river network. This interconnection is facilitated by  
162 a dense network of drainage ditches, initiated in the XIX<sup>th</sup> century, and currently  
163 maintained by forest managers in order to increase tree growth rate. The seasonal  
164 changes in groundwater table can be important, with a water table close to the  
165 surface during wet winters and levelling down to 2.0 m depth below the surface  
166 during most summers. The groundwater table is also characterized by a period of  
167 discharge (i.e., when the groundwater level decreased) and a period of reload (i.e.,  
168 when the groundwater level increased). In order to categorize the catchment

169 hydrology we use the Strahler classification but slightly modified. We define order 0  
170 as groundwater and order 1 as streams and ditches either having no tributaries or  
171 being seasonally dry (from June to November during our sampling period). With  
172 these definitions, the stream orders in the Leyre watershed range from 0  
173 (groundwater) to 4 (main river). In addition, hydrology is characterized by a period of  
174 highest flow in winter with a flood peak usually in February or March and a period of  
175 lowest flow in spring, summer and autumn.

176

## 177 **2.2. Sampling strategy and field work**

### 178 **2.2.1. Selection and characterization of stations**

179 We selected 21 sampling stations (18 river stations and 3 piezometers) within the  
180 watershed, from groundwater (order 0) to stream order 4 (main stem), after a precise  
181 characterization of the drainage basin based with a geographical information system  
182 (Fig. 1; Tab. 1). We included in the GIS the land use from the Corine Land Cover  
183 (2006) database, as well as the hydrological superficial network as a polyline form on  
184 an open water database (BD CARTHAGE<sup>®</sup>). The BD CARTHAGE<sup>®</sup> allows  
185 determine precisely the length of all streams in the watershed (Tab. 1). Based on  
186 digital elevation model (DEM) provided by French geographic institute (IGN), we  
187 divided the Leyre watershed in different sub-watersheds and we calculated their  
188 respective surface areas using ArcGIS 10.2<sup>™</sup> (Fig. 1; Tab. 1). The combination (with  
189 spatial analyst extension) of the DEM and the river network (transformed in a form  
190 point shapefile beforehand) allow assign an altitude for each river point and thus  
191 determinate the mean slope (S) per stream orders (Tab. 1).). We made one river  
192 width measure per campaign for each studied stations with either a decameter or a  
193 laser rangefinder (Tab. 1). We also sampled one groundwater spring and its  
194 respective headwater 40 meters downstream. The selected stations in stream orders  
195 1 to 4 have all a sub-watershed occupied by at 80-100 % of forest (Tab. 1).

196 Concerning river discharge and depth, our study took benefit from four calibrated  
197 gauging stations of the French water quality agency (with a daily temporal resolution  
198 for river discharge, and with a one hour time resolution for depth), located on two  
199 second order streams (the Grand Arriou (GAR) and the Bourron (BR)), one third  
200 order stream (the Petite Leyre (PL)) and one fourth order stream (the Grande Leyre



201 (GL)) (Fig. 1; Tab. 1-2). For each stream order, we calculated the drainage factors  
202 and parameter  $\alpha$  with a daily temporal resolution for a two years period (Tab. 2). The  
203 parameter  $\alpha$  is the ratio (drainage ratio) between two drainage factors (i.e., discharge  
204 divided by the corresponding catchment area, in  $\text{m}^3 \text{km}^{-2} \text{d}^{-1}$ ) of streams of  
205 successive orders (Tab. 2). Because no gauging stations were available in first order  
206 streams, we complete our hydrological dataset by performing river flow  
207 measurements on two first order streams at high flow (Feb. 2016) and at base flow  
208 (Apr. 2015) (Tab. 2). In these first order streams, we measured water velocity profiles  
209 in river section with a magnetic induction current meter (OTT MF pro<sup>TM</sup>), and we  
210 integrated the water velocity profiles in order to convert water velocity to discharge.  
211 As there is no surface runoff in the Leyre watershed the increase in drainage factors  
212 (hence the drainage ratio is  $> 1$ ) between two streams of increasing orders allows a  
213 very precise quantification of additional diffusive groundwater inputs (Tab. 2).

214 In order to fully characterize the stream geometry in the Leyre watershed, we used  
215 the hydraulic equations described in Raymond et al. (2012). We estimate width (W),  
216 depth (D) and velocity (V), for each stream orders as follows (Tab. 1):

$$217 \quad W = aQ_{\text{mean}}^b; \quad D = cQ_{\text{mean}}^d; \quad V = eQ_{\text{mean}}^f$$

218 Where,

219 a, c, e are geometry coefficients equal to 12.88, 0.4, 0.29, respectively, and b, d, f are  
220 geometry exponents equal to 0.42; 0.29; 0.29, respectively (Raymond et al. 2012).

221  $Q_{\text{mean}}$  is the mean river flow per stream orders (Tab. 1).

222 We used the mean width (estimated from Raymond et al., 2012) and the cumulated  
223 river length per stream order (estimated from BD CARTHAGE ®) to calculate the  
224 stream surface area per stream order (Tab. 1). We also used the parameters W, D, V  
225 and S to determine the gas transfer velocity in each stream orders, using the 7  
226 empirical equations determined in Raymond et al (2012) (Tab. 1).

227

### 228 **2.2.2. Field work**

229 The 21 stations were visited with a frequency of approximately one month, on 18  
230 occasions between Jan. 2014 and Jul. 2015. Exceptions were one piezometer that  
231 was visited on 16 occasions between Feb. 2014 and Jul. 2015 and two other

232 piezometers that were visited on 11 occasions between Aug. 2014 and Jul. 2015. In  
233 addition, we also sampled on 5 occasions between Mar. 2015 and Jul. 2015, a  
234 groundwater spring and its respective headwater 40 meters downstream. This  
235 headwater has a mean depth of 5 cm and a mean width of 20 cm. We estimated the  
236 discharge of this small headwater at two different periods (Feb. 2015 and Jul. 2015).  
237 For that, we used a calibrated bucket and we timed how long it took to fill it. We  
238 repeat this operation 10 times for the two different periods.

239 In total, we collected 292 samples for the concomitant measurements of temperature,  
240 pH,  $p\text{CO}_2$ , TA, calculated DIC and  $\delta^{13}\text{C}$ -DIC.

241 In the field, the partial pressure of  $\text{CO}_2$  ( $p\text{CO}_2$ ) in groundwater, stream and river  
242 waters was measured directly using an equilibrator (Frankignoulle and Borges, 2001;  
243 Polsenaere et al., 2013). This equilibrator was connected to an Infra-Red Gas  
244 Analyzer (LI-COR®, LI-820), which was calibrated one day before sampling, on two  
245 linear segments because of its non-linear response in the range of observed  $p\text{CO}_2$   
246 values (0–90,000 ppmv). This non-linearity was due to saturation of the IR cell at  
247  $p\text{CO}_2$  values above 20,000 ppmv. We used certified standards (Air Liquide™ France)  
248 of  $2,079\pm 42$ ;  $19,500\pm 390$  and  $90,200\pm 1,800$  ppmv, as well as nitrogen flowing  
249 through soda lime for the zero. For the first linear segment [0-20,000 ppmv], which  
250 corresponded to river waters, we set the zero and we span the LI-COR at 19,500  
251 ppmv, and we checked for linearity at 2,042 ppmv. For the second segment [20,000-  
252 90,000 ppmv], which corresponded to the sampled groundwaters, we measured the  
253 response of the LICOR with the standard at 90,000 ppmv, and used this measured  
254 value to make a post correction of the measured value in the field. For groundwaters,  
255 we took the precaution to renew the water in the piezometers by pumping of about  
256 300 L with a submersible pump before sampling.

257 The  $\delta^{13}\text{C}$ -DIC and DIC samples were collected using 120 mL glasses serum bottles  
258 sealed with a rubber stopper and poisoned with 0.3 mL of  $\text{HgCl}_2$  at  $20\text{ g L}^{-1}$  to avoid  
259 any microbial respiration during storage. Vials were carefully sealed taking care that  
260 no air remained in contact with samples. Vials are also stored in the dark to prevent  
261 photo-oxidation. We stored TA sampled in polypropylene bottles after filtration using  
262 a syringe equipped with glass fiber ( $0.7\ \mu\text{m}$ ). We also measure pH ( $\pm 0.05$ ) and  
263 temperature ( $\pm 0.05\ ^\circ\text{C}$ ) *in situ* with specific probe (Methrom). Before the start of each  
264 sampling trip the pH probe was calibrated using NBS buffer solutions (4, 7 and 10).

265

### 266 **2.3. Laboratory analysis**

267 The  $\delta^{13}\text{C}$ -DIC was measured following the procedure of Gillikin and Bouillon (2007).  
268 A headspace was first created in the 120 mL serum vial, by injecting 25 mL of Helium  
269 gas. Then 0.3 mL of warm 85% phosphoric acid was added in order to titrate all  
270 bicarbonates and carbonates to  $\text{CO}_2$ . To ensure gas equilibration the vials were  
271 strongly shaken. Measurements were performed using Isotope Ratio Mass  
272 Spectrometer (Micromass Isoprime), equipped with a manual gas injection port. We  
273 injected twice 2 mL of headspace gas from the vial headspace. The carbon isotope  
274 ratio is expressed in the delta notation ( $\delta^{13}\text{C}$ ) relative to Pee Dee Belemnite.  $\delta^{13}\text{C}$ -  
275 DIC was calibrated against a homemade standard (45 mg of  $\text{Na}_2\text{CO}_3$  were  
276 introduced in a sealed vial flushed with helium, and were then dissolved with 3 mL of  
277 warm 85 % phosphoric acid); this standard had been calibrated against a certified  
278 standard (NBS19, -1.96 %) using a dual-inlet IRMS (Micromass Isoprime). The  
279 isotopic value of the  $\text{Na}_2\text{CO}_3$  standard was  $-4.5 \pm 0.2$  ‰. Finally, to correct for the  
280 partitioning of  $\text{CO}_2$  between headspace and the water phase in the samples, and to  
281 calculate the  $\delta^{13}\text{C}$  of the total DIC, the isotopic fractionation of  $\text{CO}_2$  at the water-air  
282 interface as a function of lab temperature of Miyajima et al (1995) was applied.

283 TA was analyzed on filtered samples by automated electro-titration on 50 mL filtered  
284 samples with 0.1N HCl as titrant. Equivalence point was determined with a Gran  
285 method from pH between 4 and 3 (Gran, 1952). Precision based on replicate  
286 analyses was better than  $\pm 5$   $\mu\text{M}$ . For samples with a very low pH (<4.5), we bubbled  
287 the water with atmospheric air in order to degas  $\text{CO}_2$ . Consequently, the initial pH  
288 increased above the value of 5, and TA titration could be performed (Abril et al.,  
289 2015).

290 We calculated DIC from  $p\text{CO}_2$ , TA, and temperature measurements using carbonic  
291 acid dissociation constants of Millero (1979) and the  $\text{CO}_2$  solubility from Weiss (1974)  
292 as implemented in the  $\text{CO}_2\text{SYS}$  program. We also performed some direct  
293 measurements of DIC on a selection of 239 samples. DIC was measured in an extra  
294 sealed 120 mL serum vial, after creating a headspace of 25 mL with nitrogen gas,  
295 acidifying with 0.3 mL of 85% phosphoric acid, and shaking. Gas mixture from the  
296 headspace was analysed by injecting through a septum 0.5 mL of gas in a closed  
297 loop connected to the LICOR LI-820 (air flow  $0.5 \text{ L min}^{-1}$ ). Soda lime was placed after

298 the gas analyser and ensures a zero baseline at the entrance of the IRGA. Peak  
299 areas were recorded, integrated and compared to those obtained with standards  
300 made by dissolving well-known amounts of  $\text{CaCO}_3$  in distilled water at the  
301 atmospheric  $p\text{CO}_2$ . pH and TA were also measured to check the calculated DIC  
302 concentration in these standards. DIC concentrations in the samples were calculated  
303 from the water and headspace volumes and the solubility coefficient of  $\text{CO}_2$  from  
304 (Weiss, 1974). DIC measured directly was consistent with DIC calculated from  $p\text{CO}_2$   
305 and TA at  $\pm 15\%$  for a DIC range of 90-5,370  $\mu\text{mol L}^{-1}$ . Therefore, we report here the  
306 DIC dataset based on calculation with  $p\text{CO}_2$  and TA.

307

#### 308 **2.4. Degassing experiment**

309 We performed experimental degassing of dissolved  $\text{CO}_2$  in order to understand how  
310  $\delta^{13}\text{C}$ -DIC is affected when  $\text{CO}_2$  originating from the groundwater degasses to the  
311 atmosphere. We collected two 10 L containers of groundwater on the field, filled until  
312 the top without air to limit degassing. The water was poisoned immediately in the field  
313 with  $\text{HgCl}_2$  to inhibit respiration. Back in the laboratory, we pumped this water to the  
314 equilibrator to monitor continuously the  $p\text{CO}_2$ . The outlet of the equilibrator was  
315 connected to the container, recirculating the water in a closed circuit. When the value  
316 of  $p\text{CO}_2$  was stable we collected a 120 mL vial to perform  $\delta^{13}\text{C}$ -DIC measurements  
317 thereafter. Then, we aerated the water by bubbling air from the outside (thus  
318 containing  $\text{CO}_2$  close to the atmospheric concentration and isotopic value, i.e., 400  
319 ppmv and  $-7.5\text{‰}$ ) using an air pump and a bubbling system. When the decrease of  
320  $p\text{CO}_2$  was sufficient (for increments between 8,000 and 100 ppmv depending on the  
321 concentration), we stopped the aeration, wait for a stable  $p\text{CO}_2$  signal, and sample  
322 again for  $\delta^{13}\text{C}$ -DIC measurements. We repeated this operation until the water  $p\text{CO}_2$   
323 was equilibrated with the atmosphere. We also measured TA, before and after each  
324 experiment. The experiment was reproduced on two occasions, and we obtained a  
325 total of 35 pairs of  $p\text{CO}_2$  and  $\delta^{13}\text{C}$ -DIC values, or pairs of calculated DIC and  $\delta^{13}\text{C}$ -  
326 DIC values, after verifying that TA was not affected by degassing and constant during  
327 the experiment.

328

### 329 3. Calculations

#### 330 3.1. Modelling DIC isotopic equilibration during CO<sub>2</sub> degassing

331 We modelled changes in δ<sup>13</sup>C-DIC during CO<sub>2</sub> degassing on the basis of equations  
332 detailed in the StreamCO<sub>2</sub>-DEGAS, first created by Polsenaere and Abril (2012).

##### 333 3.1.1. Initial state of δ<sup>13</sup>C-CO<sub>2</sub><sup>\*</sup> in river

334 The model operates between pH 4.7 and 7.2 because between these values DIC can  
335 be simply considered as the sum of CO<sub>2</sub><sup>\*</sup> from oxidation of terrestrial organic matter  
336 and HCO<sub>3</sub><sup>-</sup> from rock weathering. Model takes into account mass conservation of the  
337 DIC, using the apparent CO<sub>2</sub> solubility constant K<sub>0</sub> (mmol L<sup>-1</sup> atm<sup>-1</sup>) of Weiss (1974)  
338 for freshwater. In the calculation, TA is assumed as conservative and not affected by  
339 gas exchange.

$$340 \delta^{13}\text{C-DIC} \cdot [\text{DIC}] = \delta^{13}\text{C-CO}_2^* \cdot [\text{CO}_2^*] + \delta^{13}\text{C-HCO}_3^- \cdot [\text{TA}] \quad (\text{Eq. 1})$$

341 In river water dissolved CO<sub>2</sub> (CO<sub>2</sub><sup>\*</sup>) is in isotopic equilibrium with bicarbonates as  
342 defined by Zhang et al (1995).

$$343 \delta^{13}\text{C-HCO}_3^- = \delta^{13}\text{C-CO}_2^* + \epsilon \quad (\text{Eq. 2})$$

344 With,

345 ε represents the isotopic fractionation (‰) of HCO<sub>3</sub><sup>-</sup> relatively to dissolved CO<sub>2</sub><sup>\*</sup>.

346 Thus, the initial stable isotopic composition of dissolved CO<sub>2</sub> is obtained from (Eq. 1)  
347 and (Eq. 2):

$$348 \delta^{13}\text{C-CO}_2^*_{\text{initial}} = \delta^{13}\text{C-DIC}_{\text{initial}} + ((\epsilon \cdot [\text{TA}]_{\text{initial}}) / [\text{DIC}]_{\text{initial}}) \quad (\text{Eq. 3})$$

349 Where,

350 δ<sup>13</sup>C-CO<sub>2</sub><sup>\*</sup><sub>initial</sub> and δ<sup>13</sup>C-DIC<sub>initial</sub> are the stable isotopic composition of initial dissolved  
351 CO<sub>2</sub> and initial DIC, respectively.

##### 352 3.1.2. Partial pressure of <sup>12</sup>CO<sub>2</sub> and <sup>13</sup>CO<sub>2</sub> in air and water

353 The initial partial pressures of <sup>12</sup>CO<sub>2</sub> and <sup>13</sup>CO<sub>2</sub> in river waters can be calculated from  
354 the water pCO<sub>2</sub> starting from (Eq. 4).

$$355 p^{13}\text{CO}_{2\text{water initial}} = \delta^{13}\text{C-PDB} \cdot p\text{CO}_{2\text{initial}} \cdot ((\delta^{13}\text{C-CO}_{2\text{initial}}^* / 1000) + 1) / 1 + \delta^{13}\text{C-PDB} \cdot \\ 356 ((\delta^{13}\text{C-CO}_{2\text{initial}}^* / 1000) + 1) \quad (\text{Eq. 4})$$

357 Where,

358  $p^{13}\text{CO}_{2\text{water initial}}$  is the initial partial pressure of  $^{13}\text{CO}_2$  in water (ppmv) and  $\delta^{13}\text{C-PDB}$   
359 refers to Pee-Dee belemnite standard isotope equal to 0.011237.

360 Then, C stable isotopes in  $\text{CO}_2$  follow the mass conservation in water as in (Eq. 5),  
361 and the Henry's law as in (Eq. 6).

$$362 \quad [\text{CO}_2^*]_{\text{water}} = [^{12}\text{CO}_2^*]_{\text{water}} + [^{13}\text{CO}_2^*]_{\text{water}} \quad (\text{Eq. 5})$$

$$363 \quad p\text{CO}_{2\text{ water}} \cdot K_0 = p^{12}\text{CO}_{2\text{ water}} K_0 + p^{13}\text{CO}_{2\text{ water}} \cdot K_0 \quad (\text{Eq. 6})$$

364 Similarly for the atmosphere, the partial pressures of each  $\text{CO}_2$  stable isotope in the  
365 air can be calculated using (Eq. 7) and (Eq. 8).

$$366 \quad p^{13}\text{CO}_{2\text{atmosphere}} = \delta^{13}\text{C-PDB} \cdot p\text{CO}_{2\text{atm}} \cdot ((\delta^{13}\text{C-CO}_{2\text{atmosphere}} / 1000) + 1) / 1 + \delta^{13}\text{C-} \\ 367 \quad \text{PDB} \cdot ((\delta^{13}\text{C-CO}_{2\text{atmosphere}} / 1000) + 1) \quad (\text{Eq. 7})$$

368 Where,

369  $p^{13}\text{CO}_{2\text{atmosphere initial}}$  is the initial partial pressure of  $^{13}\text{CO}_2$  in the atmosphere (ppm)  
370 and  $\delta^{13}\text{C-CO}_{2\text{atmosphere}}$  equates to -7.5 ‰.

371 Then,  $\text{CO}_2$  stable isotopes follow the mass conservation in the air:

$$372 \quad p\text{CO}_{2\text{ atmosphere}} = p^{12}\text{CO}_{2\text{ atmosphere}} + p^{13}\text{CO}_{2\text{ atmosphere}} \quad (\text{Eq. 8})$$

### 373 **3.3.3. Water-air gradient and flux of $^{12}\text{CO}_2$ and $^{13}\text{CO}_2$**

374 The model calculates  $\text{CO}_2$  fluxes to the atmosphere for each isotope from the  
375 following equations:

$$376 \quad F^{13}\text{CO}_2 = k_{600}K_0 (p^{13}\text{CO}_{2\text{water}} - p^{13}\text{CO}_{2\text{atmosphere}}) \quad (\text{Eq. 9})$$

377 Where,

378  $F^{13}\text{CO}_2$  represents the  $^{13}\text{CO}_2$  fluxes at the interface in  $\text{mmol m}^{-2} \text{h}^{-1}$ ;  $K_0$  is the  
379 apparent  $\text{CO}_2$  solubility constant of Weiss (1974) in  $\text{mol kg}^{-1} \text{atm}^{-1}$ ;  $k_{600}$  is an arbitrary  
380 normalized gas transfer velocity (for a Schmidt number of 600 in  $\text{cm h}^{-1}$ ).

381 Afterwards, the model calculates a loss of  $\text{CO}_2$  ( $[\text{CO}_2^*]_{\text{loss}}$ ) from river to the  
382 atmosphere for each isotope from the different water-air gradient.

$$383 \quad [^{13}\text{CO}_2^*]_{\text{loss}} = (k_{600}t/10^{-3}\text{H})K_0\Delta p^{13}\text{CO}_2 = \beta K_0(p^{13}\text{CO}_{2\text{water}} - p^{13}\text{CO}_{2\text{atmosphere}}) \quad (\text{Eq. 10})$$

384 Where,

385  $[^{13}\text{CO}_2^*]_{\text{loss}}$  is the loss of  $^{13}\text{CO}_2$  to the atmosphere in  $\text{mmol L}^{-1}$ ,  $t$  is a time constant (h)  
386 and  $H$  is the depth of the river (m); both  $t$  and  $H$  are arbitrarily fixed as their values do

387 not affect the model results (Polsenaere and Abril 2012). The same calculations are  
 388 made for  $^{12}\text{CO}_2$  fluxes and dissolved  $^{12}\text{CO}_2$  losses. In Equation (10), the term  $\beta$  is  
 389 dimensionless and proportional to the ratio between the gas transfer velocity and  
 390 water height. As the same value of  $\beta$  is applied to both isotopes, this parameter can  
 391 be fixed arbitrarily and defines the size of the iterations. In the model, the relationship  
 392 between  $\text{CO}_2$  degassing and  $\delta^{13}\text{C-DIC}$  is not affected by  $\beta$ , by the chosen gas  
 393 transfer velocity or by the river depth (Polsenaere and Abril 2012).

#### 394 **3.3.4. Loss of DIC and change in $\delta^{13}\text{C-DIC}$**

395 The  $[\text{CO}_2^*]_{\text{loss}}$  is removed from the concentration of  $^{12}\text{CO}_2^*$  and  $^{13}\text{CO}_2^*$ .

$$396 \quad [^{13}\text{CO}_2^*]_{n+1} = [^{13}\text{CO}_2^*]_n - [^{13}\text{CO}_2^*]_{\text{loss}} \quad (\text{Eq. 11})$$

$$397 \quad [^{12}\text{CO}_2^*]_{n+1} = [^{12}\text{CO}_2^*]_n - [^{12}\text{CO}_2^*]_{\text{loss}} \quad (\text{Eq. 12})$$

$$398 \quad [\text{CO}_2^*]_{n+1} = [^{13}\text{CO}_2^*]_{n+1} + [^{12}\text{CO}_2^*]_{n+1} \quad (\text{Eq. 13})$$

$$399 \quad [\text{DIC}]_{n+1} = [\text{CO}_2^*]_{n+1} + [\text{TA}] \quad (\text{Eq. 14})$$

400 When the new concentration of DIC is obtained the model calculates the new  $\delta^{13}\text{C}$  as  
 401 in (Eq. 15)

$$402 \quad \delta^{13}\text{C-DIC}_{n+1} = (\delta^{13}\text{C-CO}_2^*_{n+1} \cdot [\text{CO}_2^*]_{n+1} + [\text{TA}] \cdot \delta^{13}\text{C-HCO}_3^-_{n+1}) / ([\text{CO}_2^*]_{n+1} + \text{TA})$$

$$403 \quad (\text{Eq. 15})$$

404 Where,

$$405 \quad \delta^{13}\text{C-CO}_2^*_{n+1} = (([^{13}\text{CO}_2^*]_{n+1} / [^{12}\text{CO}_2^*]_{n+1}) / \delta^{13}\text{C-PDB}) - 1) \cdot 1000 \quad (\text{Eq. 16})$$

$$406 \quad \delta^{13}\text{C-HCO}_3^-_{n+1} = \delta^{13}\text{C-CO}_2^*_{n+1} + \varepsilon \quad (\text{Eq. 17})$$

407 Finally, from the new  $\delta^{13}\text{C}$  of the total DIC the new concentration of the DIC is  
 408 calculated.

409

## 410 4. Results

### 411 4.1. Hydrology and water mass balance in the Leyre Watershed

412 During the monitoring period (Jan. 2014-Jul. 2015), hydrology was characterized by  
413 an average discharge of  $21.3 \text{ m}^3 \text{ s}^{-1}$  at the most downstream station (Fig. 1; 2a),  
414 including two relatively short flood events (further referred as “high flow period”) in  
415 Jan. 2014 – Apr. 2014 (maximum flow  $120 \text{ m}^3 \text{ s}^{-1}$ ) and in Feb. 2015 – Mar. 2015  
416 (maximum flow  $60 \text{ m}^3 \text{ s}^{-1}$ ), and two longer periods of low flow (further referred as  
417 “base flow period”) between May. 2014 – Jan. 2015 and Apr. 2015 – Jul. 2015  
418 (minimum flow  $5.1 \text{ m}^3 \text{ s}^{-1}$  in Nov. 2014). Periods for groundwater discharging  
419 (decreasing water table) were Jan. 2014 – Oct. 2014 and Mar. 2015 - Jul. 2015, and  
420 period of groundwater loading (increasing water table) was Nov. 2014 – Mar. 2015  
421 (Fig. 2a).

422 The spatial increase in drainage ratios (i.e., parameter  $\alpha$ ) between streams of  
423 successive orders provides an estimate of additional water flows from diffusive  
424 groundwater inputs in higher stream order reaches, compared to that coming from  
425 the streams immediately upstream (because there is no surface runoff in the Leyre  
426 watershed) (Tab. 2).. This assumption is further checked when we closed the mass  
427 balance of DIC with the calculated water budget (see part 4.3). We found the  
428 following drainage ratios (i.e., parameter  $\alpha$ ) between discharges in streams of  
429 increasing orders (Tab. 2):

$$430 Q_{Or2}=1.83\pm 0.53Q_{Or1} \quad (\text{Eq. 18})$$

$$431 Q_{Or3}=1.20\pm 0.36Q_{Or2} \quad (\text{Eq. 19})$$

$$432 Q_{Or4}=1.05\pm 0.15Q_{Or3} \quad (\text{Eq. 20})$$

433 These downstream increases in drainage reflect the contributions of groundwater  
434 drainage (GW) in each stream order, relative to runoff from upstream. Thus, the  
435 water balance in the Leyre Watershed during the two years periods (Jan. 2014-Dec.  
436 2015) can be described as follows:

$$437 Q_{Or2}=Q_{Or1} (55\%) + GW_{1-2} (45\%) \quad (\text{Eq. 21})$$

$$438 Q_{Or3}=Q_{Or2} (83\%) + GW_{2-3} (17\%) \quad (\text{Eq. 22})$$

$$439 Q_{Or4}=Q_{Or3} (95\%) + GW_{3-4} (5\%) \quad (\text{Eq. 23})$$

440 Thus,



441  $Q_{Or4} = \Sigma Q_{Or2} (79\%) + GW_{2-3} (16\%) + GW_{3-4} (5\%)$  (Eq. 24)

442  $Q_{Or4} = \Sigma Q_{Or1} (43\%) + GW_{1-2} (36\%) + GW_{2-3} (16\%) + GW_{3-4} (5\%)$  (Eq. 25)

443 Where,

444  $Q_{Or1}$ ,  $Q_{Or2}$ ,  $Q_{Or3}$  and  $Q_{Or4}$  refer to river flow of each stream order and  $GW_{1-2}$ ,  $GW_{2-3}$   
445 and  $GW_{3-4}$  refer to groundwater inputs in each stream order.

446 River depths (D), widths (W), and velocities (V) modelled with hydraulic equations of  
447 Raymond et al (2012) for each stream order in the Leyre watershed are shown in  
448 Table 1, together with the available measurements of these three parameters. The  
449 modelled values of D compared very well (less than 15% difference) with those  
450 observed daily at the gauging stations in streams with order 2, 3 and 4. In the Leyre  
451 basin, the river network for stream orders 1 and 2 is highly human-managed. Hence,  
452 the modelled width values compared well with those measured in the field (Tab. 1). In  
453 contrast, in the Leyre basin, third and fourth order streams are natural and thus the  
454 spatial variability of width is higher than in streams order 1 and 2. Hence, in streams  
455 the modelled with values are further away from those measured in the field (Tab. 1).  
456 The modelled river velocities increased from less than 10 cm per second in first order  
457 streams to a maximum of 50 cm per second in fourth order streams. V values in first  
458 order streams were consistent with those measured in a headwater and a relatively  
459 large first order stream (Tab.1).

460

#### 461 **4.2. Spatio-temporal variations of $pCO_2$ , TA, DIC and $\delta^{13}C$ -DIC**

462 Throughout the sampling period,  $pCO_2$ , TA, DIC and isotopes ratios of DIC varied  
463 greatly in time (Fig. 2) and space (Tab. 3; Fig. 3) along an upstream-downstream  
464 gradient (from groundwaters to fourth order stream). A significant decrease of  $pCO_2$   
465 was observed while river order was increasing (Fig. 3a). Mean  $pCO_2$  values were  
466  $48,070 \pm 26,320$ ;  $4,820 \pm 4,540$ ;  $3,000 \pm 1,090$ ;  $1,740 \pm 580$  and  $1,740 \pm 460$  ppmv for  
467 groundwaters, first, second, third and fourth order streams, respectively (Tab. 3; Fig.  
468 3). Temporally, the stronger variations of  $pCO_2$  occurred in groundwaters and first  
469 order streams (Fig. 2b). In groundwaters, an increase of  $pCO_2$  (from 7,700 to  
470  $103,870 \pm 12,510$  ppmv) occurred during discharging periods (Fig. 2a-b). In contrast, a  
471 rapid decrease of  $pCO_2$  (down to  $28,890 \pm 2,790$  ppmv in Mar. 2015) was observed  
472 during loading periods, when groundwater was apparently diluted with rainwater (Fig.

473 2a-b). The same temporal trend occurred in first order streams, although with an  
474 amplitude much smaller ( $3,700 \pm 1,530$ - $27,205$  ppmv) than in groundwaters ( $7,680$ -  
475  $103,870 \pm 12,510$  ppmv) (Fig. 2b). Moreover, in first order streams highest value of  
476  $p\text{CO}_2$  ( $27,205$  ppmv in Sep. 2014) was associated with lowest value of groundwater  
477 table during base flow period (Fig 2a-b). In second, third and fourth order streams,  
478 water  $p\text{CO}_2$  followed a seasonal cycle asymmetric compared to groundwaters, with  
479 lower  $p\text{CO}_2$  values during base flow and higher  $p\text{CO}_2$  values during flood peaks (Fig.  
480 2a-b).

481 During the entire sampling period, TA values were not significantly different ( $p > 0.05$ )  
482 in groundwaters, first and second order streams (Tab. 3; Fig. 3b). Indeed, mean  
483 values of TA were  $71 \pm 25$ ,  $74 \pm 45$  and  $90 \pm 60$   $\mu\text{mol L}^{-1}$  respectively for groundwaters,  
484 first and second order streams (Tab. 3; Fig. 3). In contrast, a significant increase  
485 ( $p < 0.001$ ) of TA was observed between second and third order streams and between  
486 third and fourth order streams ( $p < 0.05$ ), where mean values of TA were  $230 \pm 190$  and  
487  $300 \pm 110$   $\mu\text{mol L}^{-1}$  respectively for third and fourth order streams (Tab. 3; Fig. 3b).  
488 Throughout the sampling period, the results did not show important temporal  
489 variations of TA in groundwaters, in first order streams and in second order streams  
490 (Tab. 3; Fig. 2c). Temporal variations were observed only in third order streams  
491 (range  $65 \pm 15$  -  $410 \pm 280$   $\mu\text{mol L}^{-1}$ ) and fourth order stream (range  $100 \pm 40$  -  $480 \pm 25$   
492  $\mu\text{mol L}^{-1}$ ) (Fig. 2). Seasonally, TA in third and fourth order streams increased during  
493 groundwater discharging period and decreased during groundwater loading period, to  
494 reach a minimum value during flood peak (Fig. 2a-c).

495 DIC concentrations and isotopic composition showed a clear spatial trend along the  
496 groundwater-stream-river continuum (Fig. 3c-d). Indeed, DIC concentrations  
497 significantly decreased ( $p < 0.001$ ) from  $2,300 \pm 1,120$   $\mu\text{mol L}^{-1}$  in groundwaters to  
498  $310 \pm 210$   $\mu\text{mol L}^{-1}$  in first order streams (Tab. 3; Fig. 3c). In parallel,  $\delta^{13}\text{C-DIC}$   
499 increased from  $-26.2 \pm 1.2$  ‰ in groundwaters to  $-19.8 \pm 2.7$  ‰ in first order streams  
500 (Tab. 3; Fig. 3d). More downstream, DIC concentrations remained globally constant  
501 ( $p > 0.05$ ) in first (mean is  $310 \pm 210$   $\mu\text{mol L}^{-1}$ ), second ( $240 \pm 65$   $\mu\text{mol L}^{-1}$ ) and third  
502 ( $310 \pm 180$   $\mu\text{mol L}^{-1}$ ) order streams, and finally significantly increase ( $p < 0.05$ ) in fourth  
503 order streams ( $380 \pm 100$   $\mu\text{mol L}^{-1}$ ) (Tab. 3; Fig. 3). The latter increase was related to  
504 an increase of TA (Fig. 3b), and was also concomitant with a significant ( $p < 0.01$ )  
505 increase of  $\delta^{13}\text{C-DIC}$  from  $-16.2 \pm 4.4$  ‰ in third order streams to  $-14.1 \pm 2.4$  ‰ in fourth

506 order stream (Tab. 3; Fig. 3d). Temporal variations of DIC followed those of  $p\text{CO}_2$  in  
507 groundwaters (range from 570 to  $4,590 \pm 2,700 \mu\text{mol L}^{-1}$ ) and in first order streams  
508 (range from  $225 \pm 25$  to  $1280 \mu\text{mol L}^{-1}$ ) (Fig. 2b-d). On the contrary, temporal  
509 variations of DIC in third order streams (range from  $145 \pm 15$  to  $490 \pm 270 \mu\text{mol L}^{-1}$ ) and  
510 fourth order stream (range from  $215 \pm 80$  to  $550 \pm 30 \mu\text{mol L}^{-1}$ ) followed those of TA  
511 (Fig. 3c-d). Stable isotopes compositions of DIC were globally constant in  
512 groundwaters ( $-26.2 \pm 1.2 \text{‰}$ ) (Tab. 3; Fig. 2). Furthermore, during base flow periods  
513 (May. 2014 – Jan. 2015 and Apr. 2015 – Jul. 2015),  $\delta^{13}\text{C}$ -DIC signal was also overall  
514 stable in first order streams ( $-18.9 \pm 2.4 \text{‰}$ ), second order streams ( $-18.5 \pm 2.2 \text{‰}$ ), third  
515 order streams ( $-14.9 \pm 2.5 \text{‰}$ ), and fourth order stream ( $-12.9 \pm 0.7 \text{‰}$ ) (Fig. 2e). In  
516 contrast, during the flood peaks (Feb. 2014 and Mar. 2015) we observed a significant  
517 decrease of  $\delta^{13}\text{C}$ -DIC in headwaters (down to  $-27.6 \text{‰}$  in Mar. 2015 in first order  
518 streams) and rivers (down to  $-28.9$ ,  $-35.4$  and  $-21.1 \text{‰}$  in Mar. 2015 for second, third  
519 and fourth order streams respectively). This was particularly true during the second  
520 flood event (Fig. 2e).

521

### 522 **4.3. Spring waters**

523 We sampled a groundwater spring and its very small headwater 40 meters  
524 immediately downstream. This sampling was made in order to see how fast  $\text{CO}_2$   
525 degassing could occur in very small streams and also how  $\delta^{13}\text{C}$ -DIC signal could be  
526 affected when  $\text{CO}_2$  that originates from groundwater is degassed to the atmosphere.  
527 All the discharge in the stream was apparently coming from the sampled spring. For  
528 the five sampling periods, values of  $p\text{CO}_2$  in the spring were 22,370; 30,000; 32,170;  
529 34,950 and 37,500 ppmv whereas those in the headwater (40 meters downstream)  
530 were 6,560; 9,950; 10,100; 11,050 and 10,900 ppmv. On average, spring waters had  
531 lost 70% of their dissolved  $\text{CO}_2$  in 40 meters. Values of  $\delta^{13}\text{C}$ -DIC were  $-26.7$ ;  $-26.7$ ;  $-$   
532  $24.7$ ;  $-24.6$  and  $-25.6 \text{‰}$  in the spring whereas they were  $-20.4$ ;  $-21.5$ ;  $-21.9$ ;  $-21.6$  and  
533  $-19.5 \text{‰}$ , in the headwater. Consequently, for the five sampling periods,  $p\text{CO}_2$  has  
534 lost  $21,700 \pm 6,800$  ppmv in 40 meters; in the meantime  $\delta^{13}\text{C}$ -DIC increased by  
535  $+4.7 \pm 1.7 \text{‰}$ . In addition, for a mean water velocity of  $5 \text{ cm s}^{-1}$ , the travel between the  
536 spring and the sampling point in the headwater (40 meters downstream) was covered  
537 in about 10 minutes. Thereafter, we tried to reproduce experimentally these field  
538 observations in order to compare it with our isotopic model.

539

#### 540 4.4. Degassing experiment

541 The two degassing experiments allowed describing well how  $\delta^{13}\text{C-DIC}$  is affected  
542 when  $\text{CO}_2$  originating from the groundwater degasses to the atmosphere (Fig. 4).  
543 Initial  $p\text{CO}_2$  values were 41,160 and 47,730 ppmv, TA concentrations were 35 and 70  
544  $\mu\text{mol L}^{-1}$ , DIC concentrations were 1,720 and 2,030  $\mu\text{mol L}^{-1}$ , and  $\delta^{13}\text{C-DIC}$  values  
545 were  $-26.2\pm 0.1\text{‰}$  and  $-26.5\pm 0.04\text{‰}$  for the two experiments, respectively. Final  
546  $p\text{CO}_2$  values were 530 and 460 ppmv, TA concentrations were 35 and 70  $\mu\text{mol L}^{-1}$ ,  
547 DIC concentrations were 55 and 90  $\mu\text{mol L}^{-1}$ , and  $\delta^{13}\text{C-DIC}$  value was  $-18.4\pm 0.4\text{‰}$   
548 and  $-14.2\pm 1.2\text{‰}$  for the two experiments, respectively. During the time courses of  
549 the experiments,  $p\text{CO}_2$ , DIC and  $\delta^{13}\text{C-DIC}$  values followed well the curves predicted  
550 by the degassing model (Fig. 4).

551 First, a rapid decrease in  $p\text{CO}_2$  occurred (from 41,160 to 9,360 ppmv and from  
552 47,730 to 3,260 ppmv, for the two experiments, respectively) and in DIC (from 1,720  
553 to 420  $\mu\text{mol L}^{-1}$  and from 2,030 to 200  $\mu\text{mol L}^{-1}$ ). This first period of large and rapid  
554  $\text{CO}_2$  degassing was associated with a moderate increase in  $\delta^{13}\text{C-DIC}$  (from  $-26.2\pm 0.5$   
555 to  $-24.3\pm 0.03\text{‰}$  and from  $-26.5\pm 0.04$  to  $-22.5\pm 0.2\text{‰}$ ). Later, slower decreases in  
556  $p\text{CO}_2$  (from 9,360 to 530 ppmv and from 3,260 to 460 ppmv) and in DIC (from 420 to  
557 55  $\mu\text{mol L}^{-1}$  and from 200 to 90  $\mu\text{mol L}^{-1}$ ) occurred, associated with a large increase in  
558  $\delta^{13}\text{C-DIC}$  (from  $-24.3\pm 0.03\text{‰}$  to  $-18.4\pm 0.4\text{‰}$  and from  $-22.5\pm 0.2$  to  $-14.2\pm 1.2\text{‰}$ ).

559 The general pattern of changes of  $\delta^{13}\text{C-DIC}$  due to  $\text{CO}_2$  degassing in the experiment  
560 was reasonably well reproduced with our isotopic model (Fig. 4). Some experimental  
561 degassing points slightly differ from theoretical curves in the lower-left part of the  
562 model, where a large decrease of DIC occurs with little change in  $\delta^{13}\text{C-DIC}$  (Fig. 4).  
563 This could be due to less precise analysis of  $\delta^{13}\text{C-DIC}$  at low DIC concentrations.

564

## 565 5. Discussion

### 566 5.1. Origin and temporal variations of DIC in groundwaters

567 The potential sources of DIC in groundwaters are carbonates or silicates weathering,  
568 dissolution or soil-CO<sub>2</sub> that originates from heterotrophic respiration of soil organic  
569 matter (SOM) and from plant root respiration. In addition, heterotrophic respiration  
570 occurs also in the saturated zone of the soil, that is, in the groundwater itself (Craft et  
571 al., 2002). Carbonate weathering produces DIC with  $\delta^{13}\text{C}$  of about half of that of soil-  
572 CO<sub>2</sub>, whereas silicates weathering produces DIC with  $\delta^{13}\text{C}$  with an isotopic  
573 composition close to that of soil-CO<sub>2</sub> (Das et al., 2005; Wachniew, 2006; Polsenaere  
574 and Abril, 2012). Vegetation cover in the Leyre watershed is mainly C<sub>3</sub> plants (i.e.,  
575 *Pinus pinaster*) (Govind et al., 2012).  $\delta^{13}\text{C}$  of SOM that originates from C<sub>3</sub> plants can  
576 range between -22 and -34 ‰ (Vogel et al., 1993), with an average value of -28 ‰.  
577 The latter average stable isotopic composition of SOM is in agreement with  
578 observations of Polsenaere et al (2013) who measured at the outlet of the Leyre  
579 River, an average value for  $\delta^{13}\text{C}$ -POC (Particulate Organic Carbon) of  $-28.7 \pm 0.5$  ‰  
580 over a one year sampling. In addition, little or no fractionation occurs during  
581 mineralization of SOM (Amundson et al., 1998; Ekblad et al., 2002). However, due to  
582 selective molecular diffusion of CO<sub>2</sub> through the soil pores, the isotopic composition  
583 of soil-CO<sub>2</sub> can become enriched in <sup>13</sup>C relative to SOM by up to 4-5 ‰ (Cerling et  
584 al., 1991). Carbon isotopes are also fractionated ( $\epsilon$  of about -1 ‰) during dissolution  
585 of soil-CO<sub>2</sub> into aqueous CO<sub>2</sub> (Zhang et al., 1995). Hence, the average  $\delta^{13}\text{C}$ -DIC  
586 values of  $-26.2 \pm 1.2$  ‰ observed in groundwaters are consistent with two different  
587 sources of carbon with the same isotopic signature: (i) aqueous CO<sub>2</sub> derived from  
588 respiration of soil organic matter (derived from C<sub>3</sub> plants) in soils and groundwaters,  
589 (ii) HCO<sub>3</sub><sup>-</sup> derived from weathering of silicates with soil-CO<sub>2</sub>. Aqueous CO<sub>2</sub>  
590 represented  $97 \pm 3$  % (range is 76-100 %) of the DIC in the groundwater showing the  
591 low intensity of silicate weathering. The absence of carbonate weathering in the  
592 sampled groundwater is also consistent with the lithology of the selected stations  
593 (sands), representative for the majority of the Leyre Watershed (Fig. 1). A  
594 contribution of carbonate weathering may alter the isotopic composition of DIC in  
595 groundwaters of Miocene carbonated sands located in the most downstream of the  
596 watershed, and that were not sampled here.

597 During the monitoring period, seasonal changes in carbon concentration in  
598 groundwater occurred for  $p\text{CO}_2$  and DIC but not for TA and  $\delta^{13}\text{C}\text{-DIC}$ . This reveals  
599 that although the intensity of the DIC source may change over time, the origin of  
600 groundwater DIC remained the same. Lowest values of  $p\text{CO}_2$  occurred during high  
601 flow and high groundwater table periods (Jan. 2014-Apr. 2014 and Feb. 2015-Mar.  
602 2015), as a consequence of dilution with rainwater with low DIC content that rapidly  
603 percolates through the sand (Fig. 2a-b). Moreover, during these two wet periods,  
604 draining of groundwater is stronger, rapidly recycling the DIC present in the saturated  
605 soil, and decreasing the concentration in the groundwater. Values of  $p\text{CO}_2$  in  
606 groundwaters start to increase at the beginning of the base flow period (May 2014  
607 and April 2015), as a consequence of respired DOC (Dissolved Organic Carbon), that  
608 had been accumulated in groundwater because groundwater table had reached  
609 organic horizon during last high flow period (Deirmendjian, 2016). Indeed, during high  
610 flow periods (Jan. 2014-Apr 2014 and Feb. 2015-Mar. 2015), concentration of DOC  
611 in groundwater is  $2,000\pm 1,200 \mu\text{mol L}^{-1}$  whereas during base flow periods (May.  
612 2014–Jan. 2015 and Apr. 2015–Jul. 2015) DOC concentration in groundwater is  
613  $530\pm 160 \mu\text{mol L}^{-1}$  (Deirmendjian, 2016). During summer 2014 (Jun-Aug), values of  
614  $p\text{CO}_2$  in groundwaters are stable, as a consequence of no (very low) water inputs  
615 into groundwater, as attested by the decreasing groundwater table during this period  
616 (Fig. 2a-b). The second increase (27/08/14-24/09/14) of  $p\text{CO}_2$  in groundwaters at the  
617 end of decreasing groundwater table period, could be related to a soil- $\text{CO}_2$  flush with  
618 the percolation of rainwater in the unsaturated soil (Johnson et al., 2008). However,  
619 at our study site, Sep. 2014 was one of the driest months throughout the sampling  
620 period (Fig. 2a), which suggests that soil- $\text{CO}_2$  could have been transported by simple  
621 downward diffusion. Finally, values of  $p\text{CO}_2$  in groundwaters decrease from late  
622 summer (end of Sep. 2014) to next flood peak (Mar. 2015), as a consequence of  
623 increasing groundwater table and increasing river flow, that dilutes groundwaters and  
624 that increases drainage of groundwater, respectively.

625

626

#### 627 **4.2. Inorganic carbon processes affecting the isotopic signal of riverine DIC:** 628 **$\text{CO}_2$ degassing versus carbonate weathering**

629 In order to analyse qualitatively and quantitatively the process of CO<sub>2</sub> degassing and  
630 DIC isotopic equilibration with the atmosphere in streams and rivers, we have plotted  
631  $\delta^{13}\text{C-DIC}$  as a function of  $p\text{CO}_2$ , TA, and DIC (Fig. 5). The distributions of  $\delta^{13}\text{C-DIC}$   
632 versus  $p\text{CO}_2$  followed well the trajectories predicted by the degassing model, starting  
633 in the groundwater and ending in the fourth order stream (Fig. 5a). This indicates that  
634 degassing is the dominating process that drives the spatial variations of these two  
635 parameters and that groundwater enriched in CO<sub>2</sub> is the main source of CO<sub>2</sub> in the  
636 Leyre watershed. In addition, TA is overall conservative between groundwaters, first  
637 and second order streams (Tab. 3; Fig. 2c, 3b; 5b). Consequently, changes in  $\delta^{13}\text{C-DIC}$   
638 DIC between groundwaters and second order streams are attributable to CO<sub>2</sub>  
639 evasion to the atmosphere only. Furthermore, unlike in experimental degassing (Fig.  
640 4), we never observe very high values of  $p\text{CO}_2$  with very negative  $\delta^{13}\text{C-DIC}$  (Fig. 5a)  
641 in first order streams as those found in groundwater ( $\sim -26\text{‰}$ ). This suggests that  
642 CO<sub>2</sub> evasion between groundwaters and first order streams occurs very fast.  
643 Groundwater spring sampling and the associated large loss of  $p\text{CO}_2$  of about  
644  $21,700 \pm 6,800$  ppmv in 40 meters, confirms that degassing from groundwater is a  
645 very fast process. This conclusion is in agreement with findings of Venkiteswaran et  
646 al (2014) who mentioned that most of the CO<sub>2</sub> originating from groundwaters has  
647 been lost before typical in-stream sampling occurs. Thus, to improve CO<sub>2</sub> degassing  
648 estimation at regional and global scales (at least in lowland rivers), the value of  $p\text{CO}_2$   
649 in groundwaters should be taken into account in the calculation. Otherwise, the  
650 degassing flux would be probably underestimated in such environments. In the Leyre  
651 Watershed, changes in  $\delta^{13}\text{C-DIC}$  between groundwaters and second order streams,  
652 are due to CO<sub>2</sub> degassing corresponds to an increase of  $6.9 \pm 2.9\text{‰}$  (Tab. 3; Fig. 3).  
653 As we will discuss later in section 4.3, although in-stream respiration can occur and  
654 liberate <sup>13</sup>C-depleted DIC in stream waters, its contribution to CO<sub>2</sub> degassing is  
655 probably minor compared to groundwater CO<sub>2</sub>. Consequently, DIC in first and second  
656 order streams can be considered as groundwater DIC minus a large part of CO<sub>2</sub>,  
657 which has quickly degassed.

658 In monolithic watersheds draining only silicate rocks, TA is typically very low, below  
659  $125\ \mu\text{mol L}^{-1}$  according to Meybeck (1987). In the Leyre Watershed, although TA was  
660 below this threshold in groundwaters, and in first and second order streams, TA  
661 increased in third and fourth order streams (Tab. 3; Fig. 2c, 3b, 5b), suggesting a

662 significant contribution of carbonate weathering. The changes in  $\delta^{13}\text{C}$ -DIC between  
 663 second and fourth order stream were about  $5.2 \pm 3.6$  ‰ (Tab. 3; Fig. 2e; 3d; 5), from -  
 664  $19.3 \pm 2.7$  ‰ in second order streams to  $-14.1 \pm 2.4$  ‰ in fourth order streams. This  
 665 time, the enrichment in  $^{13}\text{C}$  is attributable not only to  $\text{CO}_2$  evasion, as confirmed by  
 666 the  $p\text{CO}_2$  decrease (Tab. 3; Fig. 2b, 3a, 5a), but also to inputs of TA from weathering  
 667 of carbonates. This increase of TA in 4<sup>th</sup> order stream is consistent with the spatial  
 668 distribution of lime sand outcrops dating from Miocene Era (Fig. 1). However, the  
 669 spatial distribution of superficial lime sand does not explain the increase of TA in 3<sup>rd</sup>  
 670 order streams. This suggests that the increase of TA is due to deeper groundwater  
 671 inputs that are in contact with lime sand layers (Legigan, 1979), consistent with the  
 672 increase of TA and  $\delta^{13}\text{C}$ -DIC during base flow period (Fig. 2a-c). Indeed, DIC that  
 673 originates from dissolution of carbonate rocks tends to dominate as the major source  
 674 of alkalinity, even in watersheds where carbonates are present only in trace amounts  
 675 (Das et al 2005).

676 The  $\delta^{13}\text{C}$  values for most carbonates of marine origin is about 0 ‰ (Clark and Fritz,  
 677 1997). Carbonates then react with soil- $\text{CO}_2$  and produce DIC with an isotopic  
 678 composition close to the average of those of soil- $\text{CO}_2$  and carbonate rocks  
 679 (Salomons and Mook, 1986), ie., -12 ‰ in the Leyre watershed. In order to  
 680 differentiate the respective contributions of degassing and carbonate weathering  
 681 between second and fourth order streams, we applied a mixing model between two  
 682 DIC end-members (Fig. 5b): one end-member is DIC from second order streams and  
 683 the other end-member is DIC originates from carbonate weathering with a  $\delta^{13}\text{C}$   
 684 signature of -12 ‰:

$$685 \quad \delta^{13}\text{C-DIC}_{\text{mm}} = ([\text{DIC}]_2 \cdot \delta^{13}\text{C-DIC}_2 + x \cdot \delta^{13}\text{C-DIC}_{\text{ca}}) / ([\text{DIC}]_2 + x) \quad (\text{Eq. 26})$$

686 Where,

687  $\delta^{13}\text{C-DIC}_{\text{mm}}$  is the stable isotopic composition of DIC resulting from the mixing of the  
 688 two end-members;  $[\text{DIC}]_2$  and  $\delta^{13}\text{C-DIC}_2$  are the average composition of second  
 689 order streams;  $\delta^{13}\text{C-DIC}_{\text{ca}}$  is the average composition of  $\delta^{13}\text{C}$ -DIC from carbonate  
 690 weathering (-12 ‰);  $x$  is the fraction of DIC that originates from carbonate  
 691 weathering.

692 This mixing model does not account for the  $\text{CO}_2$  loss to the atmosphere and thus  
 693 predicts the theoretical signature of the DIC as function of TA, when carbonate



694 weathering occurs, but CO<sub>2</sub> degassing does not occur. In addition, we fitted on our  
695 data of δ<sup>13</sup>C-DIC and TA another curve of the same form as mixing model (i.e.,  $f(x) =$   
696  $(A + B \cdot x) / (C + x)$ ), without considering a preselected value as end-member (Fig.  
697 5b). δ<sup>13</sup>C-DIC and TA values of second, third and fourth order streams that are above  
698 the mean concentration of second order streams (i.e., δ<sup>13</sup>C-DIC=-19.3 ‰ and TA=90  
699 μmol L<sup>-1</sup>) were used to obtain the fitted curve (Fig. 5b).

700 In the δ<sup>13</sup>C-DIC versus TA plot (Fig. 5b), the fitted curve was well above that given by  
701 the carbonate weathering mixing model, with a quite constant difference of -1.8 ‰.  
702 This difference in δ<sup>13</sup>C-DIC is attributed to CO<sub>2</sub> degassing between second and  
703 fourth order streams, a process accounted for in the fitted curve on the experimental  
704 data points, but not in the carbonate weathering mixing model. According to these  
705 results, between second and fourth order streams, inputs of TA from carbonate  
706 weathering increase the δ<sup>13</sup>C-DIC by 3.4 ‰ whereas CO<sub>2</sub> degassing increase it by  
707 1.8 ‰. Thus, In terms of percentages, carbonate weathering explains 65% of δ<sup>13</sup>C-  
708 DIC changes between second and fourth order streams whereas water-air  
709 equilibration explains 35%. δ<sup>13</sup>C-DIC is thus an excellent tracer of the dissolved  
710 inorganic carbon processes. According to our data, transport of groundwater DIC  
711 followed by degassing in streams of increasing order is the major pathway of CO<sub>2</sub> in  
712 the Leyre watershed. Indeed, pCO<sub>2</sub>, DIC and δ<sup>13</sup>C-DIC data are explained by  
713 theoretical degassing model between groundwaters and second order streams (Fig.  
714 5a-c); in addition, we were also able to separate the effect of evasion on pCO<sub>2</sub>, DIC  
715 and δ<sup>13</sup>C-DIC, from that of carbonate weathering on TA, DIC and δ<sup>13</sup>C-DIC between  
716 second and fourth order streams (Fig. 5b).

717

### 718 **4.3. CO<sub>2</sub> degassing and DIC export at the basin scale**

719 In order to estimate CO<sub>2</sub> degassing, we apply two independent methods at the scale  
720 of the Leyre watershed. The first method consists in a mass balance calculation of  
721 CO<sub>2</sub> at the basin scale, using water discharge and dissolved CO<sub>2</sub> concentrations  
722 (Fig. 6); the second method consists in using average measured pCO<sub>2</sub> values,  
723 stream surface areas, and gas transfer velocities based on hydraulic stream  
724 geometric parameters (Raymond et al. 2012). For the first approach, we consider that  
725 the loss of CO<sub>2</sub> between two different stream orders is due to rapid groundwater CO<sub>2</sub>

726 evasion to the atmosphere, as attested by our degassing model that reproduced well  
727 *in situ*  $\delta^{13}\text{C}$ -DIC values (Fig. 5a). We use the discharge from groundwater and  
728 upstream and the difference in  $\text{CO}_2^*$  between each stream orders and the  
729 groundwater as follows:

$$730 \quad F_{\text{Or1}} = Q_{\text{Or1}}(\text{CO}_2^*_{\text{GW}} - \text{CO}_2^*_{\text{Or1}}) \quad (\text{Eq. 27})$$

$$731 \quad F_{\text{Or2}} = Q_{\text{Or1}}(\text{CO}_2^*_{\text{Or1}} - \text{CO}_2^*_{\text{Or2}}) + 0.45Q_{\text{Or2}}(\text{CO}_2^*_{\text{GW}} - \text{CO}_2^*_{\text{Or2}}) \quad (\text{Eq. 28})$$

$$732 \quad F_{\text{Or3}} = Q_{\text{Or2}}(\text{CO}_2^*_{\text{Or2}} - \text{CO}_2^*_{\text{Or3}}) + 0.17Q_{\text{Or3}}(\text{CO}_2^*_{\text{GW}} - \text{CO}_2^*_{\text{Or3}}) \quad (\text{Eq. 29})$$

$$733 \quad F_{\text{Or4}} = Q_{\text{Or3}}(\text{CO}_2^*_{\text{Or3}} - \text{CO}_2^*_{\text{Or4}}) + 0.05Q_{\text{Or4}}(\text{CO}_2^*_{\text{GW}} - \text{CO}_2^*_{\text{Or4}}) \quad (\text{Eq. 30})$$

734 Where,

735  $F_{\text{Or1}}$ ,  $F_{\text{Or2}}$ ,  $F_{\text{Or3}}$  and  $F_{\text{Or4}}$ ;  $\text{CO}_2^*_{\text{GW}}$ ,  $\text{CO}_2^*_{\text{Or1}}$ ,  $\text{CO}_2^*_{\text{Or2}}$ ,  $\text{CO}_2^*_{\text{Or3}}$  and  $\text{CO}_2^*_{\text{Or4}}$ ;  $Q_{\text{Or1}}$ ,  $Q_{\text{Or2}}$ ,  
736  $Q_{\text{Or3}}$  and  $Q_{\text{Or4}}$  are respectively, the degassing flux in  $\text{mol s}^{-1}$ , the concentration of  
737 aqueous- $\text{CO}_2$  in  $\text{mol L}^{-1}$  and the river flow  $\text{L s}^{-1}$ , in each stream order.

738 With this method, we find a total  $\text{CO}_2$  degassing flux of  $1.7 \pm 0.3 \cdot 10^4 \text{ t C yr}^{-1}$  ( $46.2 \pm 7.2$   
739  $\text{mol s}^{-1}$ ) from the watershed, first and second order streams accounting respectively  
740 for 40 % and 36 % of the total (Tab. 4; Fig. 6); In addition, it is important to note that  
741 the diffusive inputs of groundwaters in each stream orders are significant in the  
742 budget. Indeed, if we assumed that all the discharge measured at the watershed  
743 outlet (fourth stream order) was originating from first order streams (assuming  
744 discharge is conservative and groundwater inputs in second, third and fourth order  
745 streams are negligible), the total flux of  $\text{CO}_2$  evasion in the Leyre watershed would be  
746 the same, but the contribution of first order streams would be more than 90%  
747 (compared to 40% here).

748 The second method is based on the stream surface area, the water-air gradient and  
749 the gas transfer velocity. Stream hydraulic parameters ( $W$ ,  $D$ ,  $V$ ) modelled with  
750 empirical equations from Raymond et al. (2012) were relatively consistent with field  
751 measurements at the sampling stations (Tab. 1), which suggests that the calculated  
752  $k_{600}$  are robust. This second method gave a total degassing flux of  $1.5 \pm 0.5 \cdot 10^4 \text{ t C yr}^{-1}$   
753 ( $38.5 \pm 14.1 \text{ mol s}^{-1}$ ), that is 20% lower than method 1.

754  $\text{CO}_2$  degassing fluxes and  $k_{600}$  values obtained with the two independent methods  
755 were very consistent for stream orders 2, 3 and 4, but fluxes from the hydrological  
756 mass balance (method 1) were 75% higher for first order streams. This suggests that

757 in very small streams, the method based on surface area and gas transfer velocity  
758 (method 2) may underestimate outgassing. This could be due to the hotspot  
759 character of CO<sub>2</sub> evasion and the very fast degassing at the groundwater-stream  
760 interface that cannot be apprehended with conventional stream sampling. This  
761 hypothesis was confirmed by our observations in spring water that loosed 70% of  
762 their CO<sub>2</sub> 40 meters downstream.

763 Another important question that must be carefully considered when comparing the  
764 two methods is the contribution of in-stream respiration to outgassing. Indeed,  
765 method 1 based on mass balance calculation assumes that all the CO<sub>2</sub> originates  
766 from the groundwater, whereas method 2 based on gas transfer velocity accounts for  
767 all the CO<sub>2</sub> outgassed from the streams: the CO<sub>2</sub> from the groundwater and the CO<sub>2</sub>  
768 produced by in-stream net heterotrophy (Battin et al., 2008; Hotchkiss et al., 2015).  
769 The fact that method 1 (that neglects in-stream respiration) gives a CO<sub>2</sub> outgassing  
770 flux higher than that with method 2 suggests that in-stream heterotrophy is within the  
771 uncertainty of the two methods and a minor component of CO<sub>2</sub> outgassing in the  
772 Leyre watershed. In their analysis on rivers of different size Hotchkiss et al (2015),  
773 reported an average contribution of in-stream net heterotrophy of 14% the CO<sub>2</sub>  
774 degassing of US streams with discharges of less than 0.01 m<sup>3</sup> s<sup>-1</sup>. In the case of the  
775 Leyre river basin, measurements of metabolic activity in very shallow water depths of  
776 first order streams are missing. In addition, a significant part of the in-stream  
777 respiration may be benthic, using litter from riparian vegetation.

778

779

780

781 In order to close a DIC budget of the Leyre watershed (Tab.5, Fig. 6), we also  
782 calculated the export of C to the Arcachon Lagoon at the most downstream gauging  
783 stations using mean DIC concentration and mean river flow in fourth order stream. As  
784 pCO<sub>2</sub> at this downstream station was still far from the equilibrium with the  
785 atmosphere, 18% the DIC input to the coastal lagoon was in the form of Excess CO<sub>2</sub>.  
786 Excess CO<sub>2</sub> as defined as the quantity of DIC that is transferred as CO<sub>2</sub> to the  
787 atmosphere after complete water-air equilibration (Abril et al., 2000) was calculated  
788 as the difference between in-situ DIC (i.e., calculated with in situ TA, pCO<sub>2</sub> and

789 temperature) and a theoretical calculated DIC at equilibrium with the atmosphere  
790 (400 ppmv). Excess CO<sub>2</sub> will be rapidly degassed in the Arcachon lagoon. In total,  
791 the terrestrial ecosystem in the Leyre watershed exports on average 54.3±29.3 mol s<sup>-1</sup>  
792 <sup>1</sup> as DIC to surface waters. Among this total flux, 85% returns to the atmosphere from  
793 the stream surface as CO<sub>2</sub>, 3% potentially degases in the Arcachon lagoon and 12%  
794 is exported as alkalinity to the coastal ocean (Table 5).

795

796

#### 797 **IV.5.Conclusion**

798 The isotopic composition of the DIC in groundwaters and streams indicates that  
799 the primary control on carbon fluxes in first and second order streams is degassing of  
800 groundwater CO<sub>2</sub> resulting from soil respiration. In third and fourth order streams,  
801 carbonates weathering also contribute to the <sup>13</sup>C enrichment of DIC downstream. Our  
802 DIC, TA and δ<sup>13</sup>C-DIC data allowed us to quantify the relative importance of gas  
803 exchange and carbonates weathering along the river course with increasing stream  
804 orders. In order to calculate a CO<sub>2</sub> mass balance of the Leyre watershed, we used a  
805 classical method based on stream hydrology and geometry, water pCO<sub>2</sub>, surface  
806 area, and gas transfer velocity. We compared this method with a hydrological method  
807 that calculates the loss of dissolved CO<sub>2</sub> between groundwater and each stream  
808 order, using concentrations and drainage factors. The two methods give consistent  
809 results except in first order streams where the method based on water pCO<sub>2</sub> and gas  
810 transfer velocity apparently missed some CO<sub>2</sub> emission hotspots in headwaters.  
811 Evasion of CO<sub>2</sub> from first and second order streams was the dominant component of  
812 the entire DIC flux in the watershed, accounting for about 75 % of the total CO<sub>2</sub>  
813 evasion flux from river network. Overall, CO<sub>2</sub> evasion from river system represents  
814 85% of the entire DIC export from the Leyre watershed, the remaining part being  
815 alkalinity (mainly from carbonates weathering downstream) and some Excess CO<sub>2</sub>  
816 that are exported to the Arcachon Lagoon.

817

#### 818 **Acknowledgments**

819 This research is part of the CNP-Leyre project funded by the Cluster of  
820 Excellence COTE at the Université de Bordeaux (ANR-10-LABX-45). We thank

821 Dominique Poirier, Luiz Carlos Cotovicz Junior, Katixa Lajaunie-Salla, Baptiste Voltz,  
822 Gwenaëlle Chaillou and Damien Buquet (EPOC Bordeaux) for their assistance in the  
823 field. Karine Charlier and Céline Charbonnier helped with chemical and isotopic  
824 analysis; Christophe Chipeaux and Denis Loustau (ISPA, INRA Bordeaux) provided  
825 water table data and Bernard Gaillard (DIREN Aquitaine) provided river discharge  
826 chronic.

827

828

829 **References**

830

831 Abril, G., Bouillon, S., Darchambeau, F., Teodoru, C.R., Marwick, T.R., Tamooh, F.,  
832 Ochieng Omengo, F., Geeraert, N., Deirmendjian, L., Polsenaere, P., Borges,  
833 A.V., 2015. Technical Note: Large overestimation of pCO<sub>2</sub> calculated from pH  
834 and alkalinity in acidic, organic-rich freshwaters. *Biogeosciences* 12, 67–78.  
835 doi:10.5194/bg-12-67-2015

836 Abril, G., Etcheber, H., Borges, A.V., Frankignoulle, M., 2000. Excess atmospheric  
837 carbon dioxide transported by rivers into the Scheldt estuary. *Comptes*  
838 *Rendus de l'Academie des Sciences-Series IIA-Earth and Planetary Science*  
839 330, 761–768.

840 Acuña, V., Giorgi, A., Muñoz, I., Uehlinger, U.R.S., Sabater, S., 2004. Flow extremes  
841 and benthic organic matter shape the metabolism of a headwater  
842 Mediterranean stream. *Freshwater Biology* 49, 960–971.

843 Amiotte-Suchet, P., Probst, J.-L., Ludwig, W., 2003. Worldwide distribution of  
844 continental rock lithology: Implications for the atmospheric/soil CO<sub>2</sub> uptake by  
845 continental weathering and alkalinity river transport to the oceans. *Global*  
846 *Biogeochemical Cycles* 17.

847 Amundson, R., Stern, L., Baisden, T., Wang, Y., 1998. The isotopic composition of  
848 soil and soil-respired CO<sub>2</sub>. *Geoderma* 82, 83–114.

849 Augusto, L., Bakker, M.R., Morel, C., Meredieu, C., Trichet, P., Badeau, V., Arrouays,  
850 D., Plassard, C., Achat, D.L., Gallet-Budynek, A., Merzeau, D., Canteloup, D.,  
851 Najar, M., Ranger, J., 2010. Is “grey literature” a reliable source of data to  
852 characterize soils at the scale of a region? A case study in a maritime pine  
853 forest in southwestern France. *European Journal of Soil Science* 61, 807–822.  
854 doi:10.1111/j.1365-2389.2010.01286.x

855 Battin, T.J., Kaplan, L.A., Findlay, S., Hopkinson, C.S., Marti, E., Packman, A.I.,  
856 Newbold, J.D., Sabater, F., 2008. Biophysical controls on organic carbon  
857 fluxes in fluvial networks. *Nature Geosci* 2, 595–595. doi:10.1038/ngeo602

858 Borges, A.V., 2005. Do we have enough pieces of the jigsaw to integrate CO<sub>2</sub> fluxes  
859 in the coastal ocean? *Estuaries* 28, 3–27.

860 Bott, T.L., Montgomery, D.S., Newbold, J.D., Arscott, D.B., Dow, C.L., Aufdenkampe,  
861 A.K., Jackson, J.K., Kaplan, L.A., 2006. Ecosystem metabolism in streams of  
862 the Catskill mountains (Delaware and Hudson river watersheds) and lower  
863 Hudson valley. *Journal of the North American Benthological Society* 25, 1018–  
864 1044.

865 Brunet, F., Gaiero, D., Probst, J.-L., Depetris, P.J., Gauthier Lafaye, F., Stille, P.,  
866 2005. δ<sup>13</sup>C tracing of dissolved inorganic carbon sources in Patagonian rivers  
867 (Argentina). *Hydrological Processes* 19, 3321–3344.

868 Butman, D., Raymond, P.A., 2011. Significant efflux of carbon dioxide from streams  
869 and rivers in the United States. *Nature Geosci* 4, 839–842.  
870 doi:10.1038/ngeo1294

871 Cai, W.-J., Guo, X., Chen, C.-T.A., Dai, M., Zhang, L., Zhai, W., Lohrenz, S.E., Yin,  
872 K., Harrison, P.J., Wang, Y., 2008. A comparative overview of weathering  
873 intensity and HCO<sub>3</sub><sup>-</sup> flux in the world's major rivers with emphasis on the

- 874 Changjiang, Huanghe, Zhujiang (Pearl) and Mississippi Rivers. *Continental*  
875 *Shelf Research* 28, 1538–1549.
- 876 Cerling, T.E., Solomon, D.K., Quade, J., Bowman, J.R., 1991. On the isotopic  
877 composition of carbon in soil carbon dioxide. *Geochimica et Cosmochimica*  
878 *Acta* 55, 3403–3405.
- 879 Ciais, P., Sabine, C., Bala, G., Bopp, L., Brovkin, V., Canadell, J., Chhabra, A.,  
880 DeFries, R., Galloway, J., Heimann, M., Jones, C., Le Quéré, C., Myeni, R.,  
881 Piao, S., Thornton, P., 2013. Carbon and other biogeochemical cycles, in:  
882 *Climate Change 2013: The Physical Science Basis. Contribution of Working*  
883 *Group I to the Fifth Assessment Report of the Intergovernmental Panel on*  
884 *Climate Change.* Cambridge University Press, Cambridge, United Kingdom  
885 and New York, NY, USA., pp. 465–570.
- 886 Clark, I., Fritz, P., 1997. *Environmental isotopes in hydrology.* Lewis Publishers, Boca  
887 Raton, Fla.
- 888 Cole, J.J., Caraco, N.F., 2001. Carbon in catchments: connecting terrestrial carbon  
889 losses with aquatic metabolism. *Mar. Freshwater Res.* 52, 101–110.
- 890 Cole, J.J., Prairie, Y.T., Caraco, N.F., McDowell, W.H., Tranvik, L.J., Striegl, R.G.,  
891 Duarte, C.M., Kortelainen, P., Downing, J.A., Middelburg, J.J., Melack, J.,  
892 2007. Plumbing the Global Carbon Cycle: Integrating Inland Waters into the  
893 Terrestrial Carbon Budget. *Ecosystems* 10, 171–184. doi:10.1007/s10021-  
894 006-9013-8
- 895 Corbier, P., Karnay, G., Bourguin, B., Saltel, M., 2010. *Gestion des eaux souterraines*  
896 *en région Aquitaine. Reconnaissance des potentialités aquifères du Mio-Plio-*  
897 *Quaternaire des Landes de Gascogne et du Médoc en relation avec les*  
898 *SAGE. No. Rapport final, BRGM RP 57813.*
- 899 Craft, J.A., Stanford, J.A., Pusch, M., 2002. Microbial respiration within a floodplain  
900 aquifer of a large gravel-bed river. *Freshwater Biology* 47, 251–261.
- 901 Das, A., Krishnaswami, S., Bhattacharya, S.K., 2005. Carbon isotope ratio of  
902 dissolved inorganic carbon (DIC) in rivers draining the Deccan Traps, India:  
903 sources of DIC and their magnitudes. *Earth and Planetary Science Letters*  
904 236, 419–429.
- 905 Davidson, E.A., Figueiredo, R.O., Markewitz, D., Aufdenkampe, A.K., 2010.  
906 Dissolved CO<sub>2</sub> in small catchment streams of eastern Amazonia: A minor  
907 pathway of terrestrial carbon loss. *Journal of Geophysical Research:*  
908 *Biogeosciences* 115.
- 909 Deirmendjian, L., 2016. *Transfert de carbone le long du continuum végétation-sol-*  
910 *nappe-rivière-atmosphère dans le bassin de la Leyre (Landes de gascogne,*  
911 *SO France).* Université de Bordeaux.
- 912 Doctor, D.H., Kendall, C., Sebestyen, S.D., Shanley, J.B., Ohte, N., Boyer, E.W.,  
913 2008. Carbon isotope fractionation of dissolved inorganic carbon (DIC) due to  
914 outgassing of carbon dioxide from a headwater stream. *Hydrological*  
915 *Processes* 22, 2410–2423.
- 916 Ekblad, A., Nyberg, G., Högberg, P., 2002. <sup>13</sup>C-discrimination during microbial  
917 respiration of added C<sub>3</sub>-, C<sub>4</sub>-and <sup>13</sup>C-labelled sugars to a C<sub>3</sub>-forest soil.  
918 *Oecologia* 131, 245–249.

- 919 Frankignoulle, M., Borges, A.V., 2001. Direct and Indirect pCO<sub>2</sub> Measurements in a  
920 Wide Range of pCO<sub>2</sub> and Salinity Values (The Scheldt Estuary). *Aquatic*  
921 *Geochemistry* 7, 267–273. doi:10.1023/A:1015251010481
- 922 Frankignoulle, M., Bourge, I., Wollast, R., 1996. Atmospheric CO<sub>2</sub> fluxes in a highly  
923 polluted estuary (the Scheldt). *Limnology and Oceanography*.
- 924 Gillikin, D.P., Bouillon, S., 2007. Determination of δ<sup>18</sup>O of water and δ<sup>13</sup>C of  
925 dissolved inorganic carbon using a simple modification of an elemental  
926 analyser-isotope ratio mass spectrometer: an evaluation. *Rapid*  
927 *Communications in Mass Spectrometry* 21, 1475–1478.
- 928 Govind, A., Bonnefond, J.-M., Kumari, J., Moisy, C., Loustau, D., Wigneron, J.-P.,  
929 2012. Modeling the ecohydrological processes in the Landes de Gascogne,  
930 SW France, in: *Plant Growth Modeling, Simulation, Visualization and*  
931 *Applications (PMA)*, 2012 IEEE Fourth International Symposium on. IEEE, pp.  
932 133–140.
- 933 Gran, G., 1952. Determination of the equivalence point in potentiometric titrations of  
934 seawater with hydrochloric acid. *Oceanol. Acta* 5, 209–218.
- 935 Hotchkiss, E.R., Hall Jr, R.O., Sponseller, R.A., Butman, D., Klaminder, J., Laudon,  
936 H., Rosvall, M., Karlsson, J., 2015. Sources of and processes controlling CO<sub>2</sub>  
937 emissions change with the size of streams and rivers. *Nature Geoscience* 8,  
938 696–699.
- 939 Johnson, M.S., Lehmann, J., Riha, S.J., Krusche, A.V., Richey, J.E., Ometto, J.P.H.,  
940 Couto, E.G., 2008. CO<sub>2</sub> efflux from Amazonian headwater streams represents  
941 a significant fate for deep soil respiration. *Geophysical Research Letters* 35.
- 942 Jolivet, C., Augusto, L., Trichet, P., Arrouays, D., 2007. Forest soils in the Gascony  
943 Landes Region: formation, history, properties and spatial variability [WWW  
944 Document]. URL <http://hdl.handle.net/2042/8480>
- 945 Keeling, C.D., Carter, A.F., Mook, W.G., 1984. Seasonal, latitudinal, and secular  
946 variations in the abundance and isotopic ratios of atmospheric CO<sub>2</sub>: 2. Results  
947 from oceanographic cruises in the tropical Pacific Ocean. *Journal of*  
948 *Geophysical Research: Atmospheres* (1984–2012) 89, 4615–4628.
- 949 Kocic, J., Wallin, M.B., Chmiel, H.E., Denfeld, B.A., Sobek, S., 2015. Carbon dioxide  
950 evasion from headwater systems strongly contributes to the total export of  
951 carbon from a small boreal lake catchment. *Journal of Geophysical Research:*  
952 *Biogeosciences* 120, 2014JG002706. doi:10.1002/2014JG002706
- 953 Lauerwald, R., Hartmann, J., Moosdorf, N., Kempe, S., Raymond, P.A., 2013. What  
954 controls the spatial patterns of the riverine carbonate system?—A case study  
955 for North America. *Chemical geology* 337, 114–127.
- 956 Legigan, P., 1979. L'élaboration de la formation du sable des Landes, dépôt résiduel  
957 de l'environnement sédimentaire pliocène-pléistocène centre aquitain. Institut  
958 de géologie du Bassin d'Aquitaine.
- 959 Martin, J.-M., Meybeck, M., 1979. Elemental mass-balance of material carried by  
960 major world rivers. *Marine chemistry* 7, 173–206.
- 961 Meybeck, M., 1987. Global chemical weathering of surficial rocks estimated from  
962 river dissolved loads. *American Journal of Science* 401–428.



- 963 Meybeck, M., 1982. Carbon, nitrogen, and phosphorus transport by world rivers. *Am.*  
964 *J. Sci* 282, 401–450.
- 965 Meybeck, M., 1981. River transport of organic carbon to the ocean. NAS-NRC  
966 Carbon Dioxide Effects Res. and Assessment Program: Flux of Org. Carbon  
967 by Rivers to the Oceans p 219-269(SEE N 81-30674 21-45).
- 968 Millero, F.J., 1979. The thermodynamics of the carbonate system in seawater.  
969 *Geochimica et Cosmochimica Acta* 43, 1651–1661.
- 970 Miyajima, T., Miyajima, Y., Hanba, Y.T., Yoshii, K., Koitabashi, T., Wada, E., 1995.  
971 Determining the stable isotope ratio of total dissolved inorganic carbon in lake  
972 water by GC/C/IRMS. *Limnology and Oceanography* 40, 994–1000.
- 973 Moreaux, V., Lamaud, É., Bosc, A., Bonnefond, J.-M., Medlyn, B.E., Loustau, D.,  
974 2011. Paired comparison of water, energy and carbon exchanges over two  
975 young maritime pine stands (*Pinus pinaster* Ait.): effects of thinning and  
976 weeding in the early stage of tree growth. *Tree physiology* tpr048.
- 977 Polsenaere, P., Abril, G., 2012. Modelling CO<sub>2</sub> degassing from small acidic rivers  
978 using water pCO<sub>2</sub>, DIC and δ<sup>13</sup>C-DIC data. *Geochimica et Cosmochimica*  
979 *Acta* 91, 220–239. doi:10.1016/j.gca.2012.05.030
- 980 Polsenaere, P., Savoye, N., Etcheber, H., Canton, M., Poirier, D., Bouillon, S., Abril,  
981 G., 2013a. Export and degassing of terrestrial carbon through watercourses  
982 draining a temperate podzolized catchment. *Aquatic sciences* 75, 299–319.
- 983 Polsenaere, P., Savoye, N., Etcheber, H., Canton, M., Poirier, D., Bouillon, S., Abril,  
984 G., 2013b. Export and degassing of terrestrial carbon through watercourses  
985 draining a temperate podzolized catchment. *Aquatic sciences* 75, 299–319.
- 986 Raymond, P.A., Hartmann, J., Lauerwald, R., Sobek, S., McDonald, C., Hoover, M.,  
987 Butman, D., Striegl, R., Mayorga, E., Humborg, C., Kortelainen, P., Dürr, H.,  
988 Meybeck, M., Ciais, P., Guth, P., 2013. Global carbon dioxide emissions from  
989 inland waters. *Nature* 503, 355–359. doi:10.1038/nature12760
- 990 Raymond, P.A., Zappa, C.J., Butman, D., Bott, T.L., Potter, J., Mulholland, P.,  
991 Laursen, A.E., McDowell, W.H., Newbold, D., 2012. Scaling the gas transfer  
992 velocity and hydraulic geometry in streams and small rivers. *Limnology and*  
993 *Oceanography: Fluids and Environments* 2, 41–53.
- 994 Riley, A.J., Dodds, W.K., 2013. Whole-stream metabolism: strategies for measuring  
995 and modeling diel trends of dissolved oxygen. *Freshwater Science* 32, 56–69.  
996 doi:10.1899/12-058.1
- 997 Salomons, W., Mook, W.G., 1986. Isotope geochemistry of carbonates in the  
998 weathering zone. *Handbook of environmental isotope geochemistry* 2, 239–  
999 269.
- 1000 Venkiteswaran, J.J., Schiff, S.L., Wallin, M.B., 2014. Large Carbon Dioxide Fluxes  
1001 from Headwater Boreal and Sub-Boreal Streams. *PLoS ONE* 9, e101756.  
1002 doi:10.1371/journal.pone.0101756
- 1003 Vidon, P., Allan, C., Burns, D., Duval, T.P., Gurwick, N., Inamdar, S., Lowrance, R.,  
1004 Okay, J., Scott, D., Sebestyen, S., 2010. Hot spots and hot moments in  
1005 riparian zones: Potential for improved water quality management<sup>1</sup>. Wiley  
1006 Online Library.

- 1007 Vogel, J.C., Ehleringer, J.R., Hall, A.E., Farquhar, G.D., 1993. Variability of carbon  
1008 isotope fractionation during photosynthesis., in: *Stable Isotopes and Plant*  
1009 *Carbon-Water Relations*. Academic Press Inc., pp. 29–46.
- 1010 Wachniew, P., 2006. Isotopic composition of dissolved inorganic carbon in a large  
1011 polluted river: The Vistula, Poland. *Chemical Geology* 233, 293–308.
- 1012 Wallin, M.B., Grabs, T., Buffam, I., Laudon, H., Ågren, A., Öquist, M.G., Bishop, K.,  
1013 2013. Evasion of CO<sub>2</sub> from streams – The dominant component of the carbon  
1014 export through the aquatic conduit in a boreal landscape. *Glob Change Biol*  
1015 19, 785–797. doi:10.1111/gcb.12083
- 1016 Weiss, R., 1974. Carbon dioxide in water and seawater: the solubility of a non-ideal  
1017 gas. *Marine chemistry* 2, 203–215.
- 1018 Zappa, C.J., McGillis, W.R., Raymond, P.A., Edson, J.B., Hints, E.J., Zemmelen,  
1019 H.J., Dacey, J.W., Ho, D.T., 2007. Environmental turbulent mixing controls on  
1020 air-water gas exchange in marine and aquatic systems. *Geophysical Research*  
1021 *Letters* 34.
- 1022 Zhang, J., Quay, P.D., Wilbur, D.O., 1995. Carbon isotope fractionation during gas-  
1023 water exchange and dissolution of CO<sub>2</sub>. *Geochimica et Cosmochimica Acta*  
1024 59, 107–114.
- 1025
- 1026

| Stream orders                                                                  | 0*  | 1          | 2         | 3         | 4         |
|--------------------------------------------------------------------------------|-----|------------|-----------|-----------|-----------|
| Number of streams in the whole watershed <sup>a</sup>                          |     | 619        | 69        | 2         | 1         |
| Cumulated river length for the whole watershed <sup>a</sup> (km)               |     | 1,610      | 750       | 115       | 40        |
| Cumulated river flow <sup>b</sup> (m <sup>3</sup> s <sup>-1</sup> )            |     | 9.2±2.6    | 16.8±5.0  | 20.2±2.8  | 21.3      |
| Mean river flow <sup>c</sup> (m <sup>3</sup> s <sup>-1</sup> )                 |     | 0.01±0.004 | 0.24±0.07 | 10.1±1.4  | 21.3      |
| Depth <sup>d</sup> (m)                                                         |     | 0.12±0.03  | 0.27±0.08 | 0.78±0.11 | 0.97±0.14 |
| Width <sup>d</sup> (m)                                                         |     | 2.2±0.6    | 7.1±2.1   | 34.0±4.8  | 46.5±6.5  |
| Velocity <sup>d</sup> (m s <sup>-1</sup> )                                     |     | 0.05±0.02  | 0.12±0.04 | 0.37±0.05 | 0.46±0.06 |
| Water surface area <sup>e</sup> (km <sup>2</sup> )                             |     | 3.5±1.0    | 5.3±1.6   | 3.9±0.5   | 1.9±0.3   |
| Slope <sup>f</sup> (%)                                                         |     | 0.310±0.28 | 0.23±0.14 | 0.11      | 0.04      |
| k <sub>600</sub> <sup>g</sup> (m d <sup>-1</sup> )                             |     | 1.2±0.6    | 1.9±0.4   | 3.4±0.8   | 2.1±0.5   |
| Number of the studied stations                                                 | 3   | 6          | 6         | 4         | 2         |
| River width of the studied stations <sup>h</sup> (m)                           |     | 1.7±1.2    | 5.2±2.4   | 15±5.5    | 31±10.8   |
| River length of the studied stations <sup>i</sup> (km)                         |     | 2.6±1.4    | 10.8±4.6  | 57.5±7.5  | 40        |
| Forest occupation of the studied stations <sup>l</sup> (%)                     | 100 | 96±3       | 86±3      | 83±2      | 84±0.4    |
| Catchment surface area of the studied stations <sup>k</sup> (km <sup>2</sup> ) |     | 15±13      | 98±40     | 446±99    | 1,863±240 |
| Number of gauging stations <sup>l</sup>                                        |     | 0          | 2         | 1         | 1         |
| Depth of the gauging stations <sup>m</sup> (m)                                 |     | 0.13±0.01  | 0.32±0.16 | 0.72±0.32 | 1.14±0.85 |
| Water velocity <sup>n</sup> (m s <sup>-1</sup> )                               |     | 0.10±0.08  |           |           |           |

1027 Table 1: Characteristics of the Leyre watershed and sampling network. \* order zero corresponds to groundwater. <sup>a, i</sup> calculated from BD CARTHAGE ®.  
1028 <sup>b</sup>estimated from our hydrological model and from the mean river flow of 21.3 m<sup>3</sup> s<sup>-1</sup> during the sampling period (Tab. 2). <sup>c</sup>Mean river flow (Q<sub>mean</sub>) is determined  
1029 with the cumulated river flow and the number of streams per stream orders. <sup>d</sup>estimated using hydraulic equations from Raymond et al (2012). <sup>e</sup>estimated from  
1030 cumulated river length and mean width per stream orders. <sup>f, k</sup>estimated from ArcGIS 10.2 (spatial analyst extension). <sup>g</sup>estimated as the average (±SD) gas  
1031 transfer velocity given by the 7 quations of Raymond et al (2012). <sup>h</sup>estimated from field measurements (decameter or laser rangefinder). <sup>l</sup>estimated with corine

1032 land cover 2006. <sup>l</sup>Gauging stations are included in the number of the studied stations. <sup>m</sup>estimated from the French water agency database over the 2014-2015  
1033 period in second, third and fourth order stream; estimated from field measurements in first order streams (in headwater's spring and in a larger first order  
1034 stream). <sup>n</sup>estimated from field measurements (in headwater's spring and in a larger first order stream).  
1035

| Stream order       |                                                       | Order 2 | Order 3   | Order 4    |             |
|--------------------|-------------------------------------------------------|---------|-----------|------------|-------------|
| Gauging stations   |                                                       | GAR     | BR        | PL         | GL          |
| 2014-2015          | Q (m <sup>3</sup> s <sup>-1</sup> )                   | 0.4±0.5 | 1.0±1.3   | 3.5±3.7    | 17.9±20.4   |
|                    | Dr (m <sup>3</sup> km <sup>-2</sup> s <sup>-1</sup> ) | 765±970 | 920±1,340 | 855±920    | 940±1,070   |
|                    | α (unitless)                                          |         |           | 1.41±0.45* | 0.98±0.28** |
|                    |                                                       | Order 1 | Order 2   |            |             |
| 01/04/2015         | Q <sub>1</sub>                                        | 0.305   | 1.29      | 0.435      |             |
|                    | Dr <sub>1</sub>                                       | 773     | 995       | 1,140      |             |
|                    | α <sub>1</sub>                                        |         | 1.29      | 1.48       |             |
|                    | Q <sub>2</sub>                                        | 0.276   | 1.29      | 0.435      |             |
|                    | Dr <sub>2</sub>                                       | 732     | 995       | 1,140      |             |
|                    | α <sub>2</sub>                                        |         | 1.36      | 1.56       |             |
| 22/02/2016         | Q <sub>3</sub>                                        | 0.304   | 2.30      | 0.487      |             |
|                    | Dr <sub>3</sub>                                       | 771     | 1,774     | 1,275      |             |
|                    | α <sub>3</sub>                                        |         | 2.30      | 1.65       |             |
|                    | Q <sub>4</sub>                                        | 0.233   | 2.30      | 0.487      |             |
|                    | Dr <sub>4</sub>                                       | 610     | 1,774     | 1,275      |             |
|                    | α <sub>4</sub>                                        |         | 2.91      | 2.09       |             |
| Hydrological model | α <sub>mean</sub>                                     |         | 1.83±0.53 | 1.20±0.36  | 1.05±0.15   |
|                    | % of groundwater                                      | 100%    | 45 %      | 17 %       | 5 %         |

1036 Table 2: Hydrological model of the Leyre watershed. Q is the mean daily (±SD) river flow during the 2014-2015 period. Dr is the mean daily (±SD) drainage  
1037 factor (i.e., discharge divided by the catchment area) during the 2014-2015 period. α is the ratio between two drainages of two streams of successive orders.  
1038 \*compared to the Grand Arriou (GAR) stream (catchment area = 112 km<sup>2</sup>, slope = 0.24%). \*\*compared to the Bourron (BR) stream (catchment area = 33 km<sup>2</sup>,  
1039 slope = 0.47%). Q<sub>1</sub>, Q<sub>2</sub>, Q<sub>3</sub>, Q<sub>4</sub> correspond to the discharge of the four river flow measurements in first order streams as well as the discharge of the GAR and  
1040 the BR the same day. Dr<sub>1</sub>, Dr<sub>2</sub>, Dr<sub>3</sub> and Dr<sub>4</sub> and α<sub>1</sub>, α<sub>2</sub>, α<sub>3</sub> and α<sub>4</sub> are the corresponding drainage factors and drainage ratios, respectively. α<sub>mean</sub> correspond to  
1041 the mean increase of drainage ratio between streams of successive orders. For example, in second order streams α<sub>Order2</sub> = 1.83±0.53α<sub>Order1</sub> means that

1042  $Q_{\text{Order2}}=1.83\pm 0.53Q_{\text{Order1}}$  and that diffusive groundwater inputs in second order streams represented 45% of their water discharge while the 55% remaining is  
1043 coming from first order streams.

|              | T<br>(°C)                     | pH                          | Conductivity<br>( $\mu\text{S m}^{-1}$ ) | $p\text{CO}_2$<br>(ppmv)                | TA<br>( $\mu\text{mol L}^{-1}$ ) | DIC<br>( $\mu\text{mol L}^{-1}$ ) | $\delta^{13}\text{C-DIC}$<br>(‰)  |
|--------------|-------------------------------|-----------------------------|------------------------------------------|-----------------------------------------|----------------------------------|-----------------------------------|-----------------------------------|
| Groundwater  | <b>13.5±2.2</b><br>[8.5~17.9] | <b>4.5±0.2</b><br>[3.7~4.8] | <b>113±45</b><br>[67~268]                | <b>48,070±26,320</b><br>[7,680~116,380] | <b>71±25</b><br>[32~135]         | <b>2,300±1,120</b><br>[570~5,370] | <b>-26.2±1.2</b><br>[-28.8~-23.4] |
| First order  | <b>12.9±4</b><br>[4.8~22.1]   | <b>5.9±0.4</b><br>[5.1~6.9] | <b>116±28</b><br>[72~187]                | <b>4,820±4,540</b><br>[1,010~27,205]    | <b>74±45</b><br>[29~280]         | <b>310±210</b><br>[87~1,280]      | <b>-19.8±2.7</b><br>[-27.6~-12.4] |
| Second order | <b>12.8±2.7</b><br>[6.3~18.3] | <b>6.1±0.5</b><br>[4.6~6.9] | <b>120±35</b><br>[62~256]                | <b>3,000±1,090</b><br>[1,445~6,430]     | <b>90±60</b><br>[30~410]         | <b>240±65</b><br>[140~545]        | <b>-19.3±2.7</b><br>[-27.4~-13.5] |
| Third order  | <b>13.4±3.1</b><br>[7.8~19.5] | <b>6.6±0.5</b><br>[5.5~7.5] | <b>130±20</b><br>[83~180]                | <b>1,740±580</b><br>[1,058~3,271]       | <b>230±190</b><br>[35~715]       | <b>310±180</b><br>[120~780]       | <b>-16.2±4.4</b><br>[-35.4~-11.5] |
| Fourth order | <b>13.6±3</b><br>[9~18.4]     | <b>6.8±0.3</b><br>[5.9~7.3] | <b>150±20</b><br>[81~198]                | <b>1,740±460</b><br>[1,163~2,925]       | <b>300±110</b><br>[60~500]       | <b>380±100</b><br>[140~580]       | <b>-14.1±2.4</b><br>[-21.1~-11.9] |

1044 Table 3: Spatial distribution of dissolved inorganic carbon and ancillary parameters in the Leyre watershed throughout the sampling period (Jan. 2014-Jul.  
1045 2015); Average±SD are shown in bold (averaged value at different stations with same stream order) and range are shown between brackets (range of all  
1046 stations with same stream order).

1047

| Stream Orders                                                                    | 1 <sup>st</sup> | 2 <sup>nd</sup> | 3 <sup>rd</sup> | 4 <sup>th</sup> |
|----------------------------------------------------------------------------------|-----------------|-----------------|-----------------|-----------------|
| <b>Method 1</b>                                                                  |                 |                 |                 |                 |
| Water discharge (m <sup>3</sup> s <sup>-1</sup> )                                |                 |                 |                 |                 |
| From groundwater                                                                 | 9.2±2.6         | 7.6±2.1         | 3.4±1.0         | 1.1±0.1         |
| From upstream                                                                    | 0               | 9.2±2.6         | 16.8±5.0        | 20.2±2.8        |
| Total                                                                            | 9.2±2.6         | 16.8±5.0        | 20.2±2.8        | 21.3            |
| ΔCO <sub>2</sub> <sup>*</sup> (μmol L <sup>-1</sup> )                            |                 |                 |                 |                 |
| With groundwater                                                                 | 2,018           | 2,110           | 2,171           | 2,172           |
| With upstream                                                                    |                 | 91              | 62              | 1               |
| CO <sub>2</sub> <sup>*</sup> degassing flux (mol s <sup>-1</sup> )               |                 |                 |                 |                 |
| From groundwater                                                                 | 18.6±5.2        | 15.9±4.5        | 7.5±2.2         | 2.3±0.3         |
| From upstream                                                                    | 0               | 0.9±0.2         | 1.0±0.3         | 0.02±0.002      |
| Total                                                                            | 18.6±5.2        | 16.8±4.5        | 8.5±2.3         | 2.3±0.3         |
| Contribution to the total (%)                                                    | 40              | 36              | 18              | 6               |
| Aerial CO <sub>2</sub> flux <sup>a</sup> (μmol m <sup>-2</sup> s <sup>-1</sup> ) | 5.3±2.1         | 3.1±1.3         | 2.2±0.7         | 1.3±0.2         |
| k <sup>b</sup> (m d <sup>-1</sup> )                                              | 2.1±2.0         | 2.2±1.1         | 2.9±1.3         | 1.7±0.6         |
| k <sub>600</sub> (m d <sup>-1</sup> )                                            | 2.5±2.4         | 2.5±1.3         | 3.5±1.5         | 2.0±0.7         |
| <b>Method 2</b>                                                                  |                 |                 |                 |                 |
| Surface area                                                                     | 3.5±1.0         | 5.3±1.6         | 3.9±0.5         | 1.9±0.3         |
| ΔpCO <sub>2</sub> (μatm)                                                         | 4,420           | 2,600           | 1,340           | 1,340           |
| k <sub>600</sub> <sup>c</sup> (m d <sup>-1</sup> )                               | 1.2±0.6         | 1.9±0.4         | 3.4±0.8         | 2.1±0.5         |
| Aerial CO <sub>2</sub> flux (μmol m <sup>-2</sup> s <sup>-1</sup> )              | 3.0±1.1         | 2.8±0.6         | 2.5±0.5         | 1.5±0.5         |
| CO <sub>2</sub> <sup>*</sup> degassing flux (mol s <sup>-1</sup> )               | 10.6±10.5       | 15.1±7.6        | 9.9±4.2         | 2.8±1.2         |
| Contribution to the total (%)                                                    | 28              | 39              | 26              | 7               |

1048 Table 4: Water discharge and degassing CO<sub>2</sub> fluxes in each stream order in the Leyre Watershed. <sup>a</sup>calculated as the flux divided by the surface  
1049 area of water. <sup>b</sup>for method 1, k was calculated as the degassing flux divided by the water stream area and the water-air gradient (with pCO<sub>2</sub> air =



1050 400 ppmv).<sup>c</sup> for method 2,  $k_{600}$  was calculated as the average ( $\pm$ SD) of values given by the 7 empirical equations proposed by Raymond et al.  
1051 (2012) as function of discharge, slope, velocity, and/or depth.

1052

1053

|                                                            |                       | mol s <sup>-1</sup> | g C m <sup>-2</sup> yr <sup>-1</sup> | % of total |
|------------------------------------------------------------|-----------------------|---------------------|--------------------------------------|------------|
| CO <sub>2</sub> outgassing from streams                    | 1 <sup>st</sup> order | 18.6±5.2            | 3.4±0.9                              | 34         |
|                                                            | 2 <sup>nd</sup> order | 16.8±4.5            | 3.0±0.8                              | 31         |
|                                                            | 3 <sup>rd</sup> order | 8.5±2.3             | 1.5±0.4                              | 16         |
|                                                            | 4 <sup>th</sup> order | 2.3±0.3             | 0.4±0.06                             | 4          |
|                                                            | Sub-Total             | 46.2±7.2            | 8.3±1.3                              | 85         |
| DIC Export as excess CO <sub>2</sub> to coastal ocean      |                       | 1.4±0.5             | 0.25±0.01                            | 3          |
| DIC Export at the atmospheric equilibrium to coastal ocean |                       | 6.7±2.5             | 1.2±0.5                              | 12         |
| Total DIC export from the watershed                        |                       | 54.3±29.3           | 9.8±5.3                              | 100%       |

1054 Table 5: DIC budget of the Leyre watershed. Fluxes are given as absolute numbers (mol s<sup>-1</sup>) or as normalized to the surface area of the entire watershed (g C  
1055 m<sup>-2</sup> yr<sup>-1</sup>).

1056

1057

1058

1059 **Figure 1:** Map of the Leyre watershed showing the river network, the lithology and  
1060 the locations of groundwater and surface waters sampling and gauging stations and  
1061 their associated sub-watersheds. Gauging stations are all also sampling stations. GL,  
1062 PL, GAR, BR are respectively the Grande Leyre, the Petite Leyre, the Grand Arriou,  
1063 the Bourron gauging stations of the French water agency.

1064 **Figure 2:** Seasonal variations of hydrology and inorganic carbon speciation and  
1065 isotopic composition in the different river orders. (a) Daily discharge of the Leyre  
1066 River at the outlet, groundwater table at the Bilos station and monthly precipitation at  
1067 Belin-Beliet municipality, (b) partial pressure of carbon dioxide ( $p\text{CO}_2$ ), (c) total  
1068 alkalinity (TA), (d) dissolved inorganic carbon (DIC), (e) stable isotopic composition of  
1069 DIC ( $\delta^{13}\text{C-DIC}$ ). Each point represents the mean value obtained at different stations  
1070 with same stream order (spatial average), and the error bars correspond to the  
1071 Pearson standard deviation (spatial heterogeneity). Grey side bar represents high  
1072 flow periods

1073 **Figure 3:** Spatial variations of dissolved inorganic carbon species in the Leyre  
1074 watershed during the study period according to stream order. (a) Partial pressure of  
1075 carbon dioxide ( $p\text{CO}_2$ ), (b) total alkalinity (TA), (c) dissolved inorganic carbon (DIC),  
1076 (d) stable isotope composition of DIC ( $\delta^{13}\text{C-DIC}$ ). Box-plots represent the mean (red  
1077 bar), the median (black bar) as well as 10<sup>th</sup>, 25<sup>th</sup>, 75<sup>th</sup> and 95<sup>th</sup> percentile. A black  
1078 square indicates that data were significantly different from those immediately at their  
1079 left with  $p < 0.001$ . A white square indicate that data were significantly different from  
1080 those immediately at their left with  $p < 0.05$ .

1081 **Figure 4:** Isotopic equilibration of DIC during experimental degassing. Results of the  
1082 two degassing experiments, showing the evolution of  $p\text{CO}_2$ , DIC and  $\delta^{13}\text{C-DIC}$ . The  
1083 continuous lines show the theoretical degassing model. Note that total alkalinity (TA)  
1084 was constant during the experiments.

1085 **Figure 5:** Stable isotopic composition of DIC ( $\delta^{13}\text{C-DIC}$ ) plotted against  $p\text{CO}_2$  (a), TA  
1086 (b) and DIC (c) for groundwaters and each stream orders. Empty symbols  
1087 correspond to high flow samples whereas full symbols correspond to base flow  
1088 samples. Larger symbols with error bars correspond to the average  $\pm$  SD (standard  
1089 deviation) in each stream order throughout sampling period. Curves in panel (a) and  
1090 (c), represent modeled changes in  $\delta^{13}\text{C-DIC}$  considering only the loss of  $\text{CO}_2$  by  
1091 degassing from stream water to the atmosphere; the theoretical model was applied  
1092 using a TA value of  $72 \mu\text{mol L}^{-1}$  (dashed line), which corresponds to the mean  
1093 concentration in groundwaters and a value of  $296 \mu\text{mol L}^{-1}$  (solid line), which  
1094 corresponds to the mean concentration in fourth order streams. Curves in panel (b),  
1095 represent a mixing model (dash line) for the contribution of carbonate weathering and  
1096 a mixing model (solid line) fitted to the dataset in second, third and fourth order  
1097 streams above the mean signal of second order stream (TA =  $90 \mu\text{mol L}^{-1}$ ,  $\delta^{13}\text{C-DIC} =$   
1098  $-19.3 \text{‰}$ ).

1099 **Figure 6:** Mass balance of DIC along the groundwater-stream-atmosphere  
1100 continuum in the Leyre Watershed during the monitoring period (Jan. 2014-Jul.  
1101 2015). Black arrows and black numbers represent water fluxes in  $\text{m}^3 \text{s}^{-1}$ . Red arrows  
1102 and red numbers represent DIC fluxes in  $\text{mol s}^{-1}$ . Orange arrows and orange  
1103 numbers represent dissolved  $\text{CO}_2$  fluxes in  $\text{mol s}^{-1}$ . Blue arrows and blue numbers  
1104 represent atmospheric  $\text{CO}_2$  fluxes in  $\text{mol s}^{-1}$ . The export of DIC and excess  $\text{CO}_2$   
1105 between each boxes are calculated from the mean concentration during the  
1106 monitoring period (Jan. 2014-Jul. 2015) and the corresponding water flux. The  
1107 degassing flux in blue is calculated following the equations 27, 28, 29 and 30.



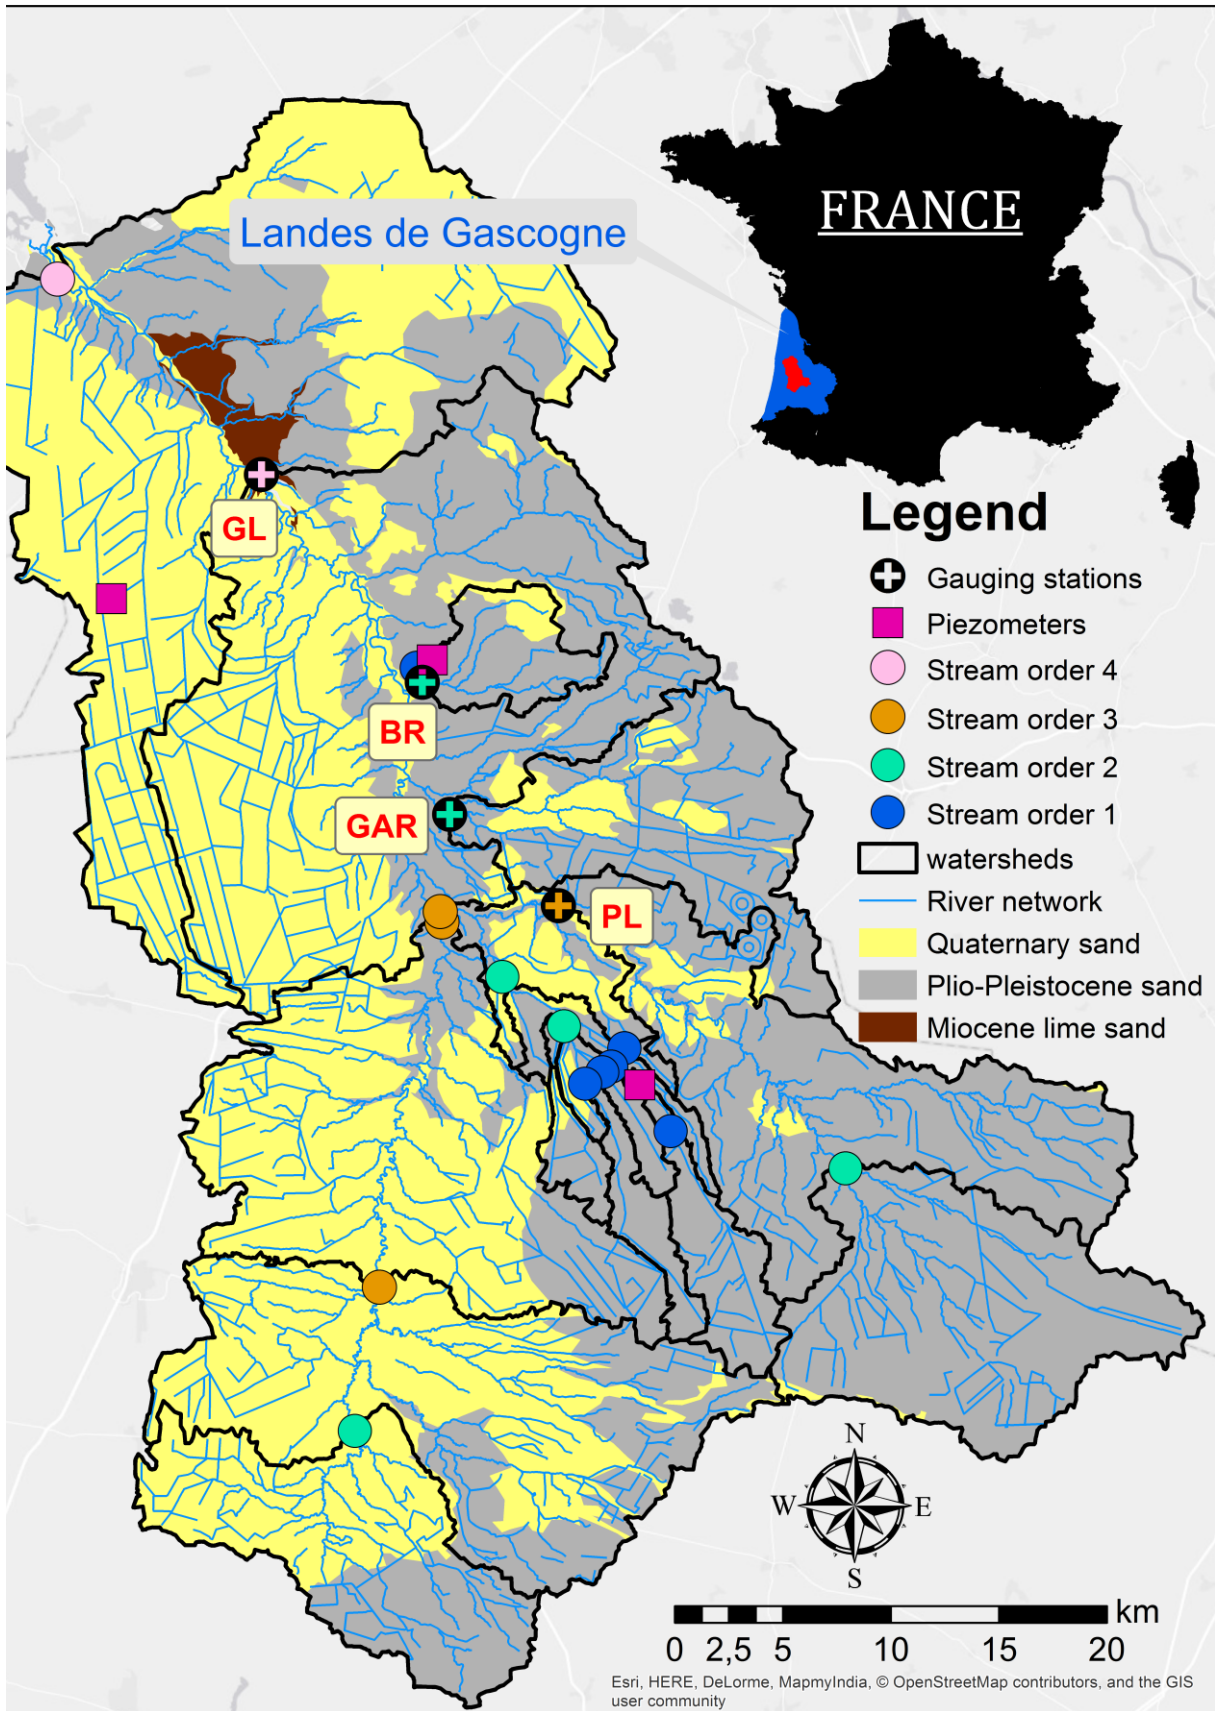

1109

1110 FIGURE 1

1111

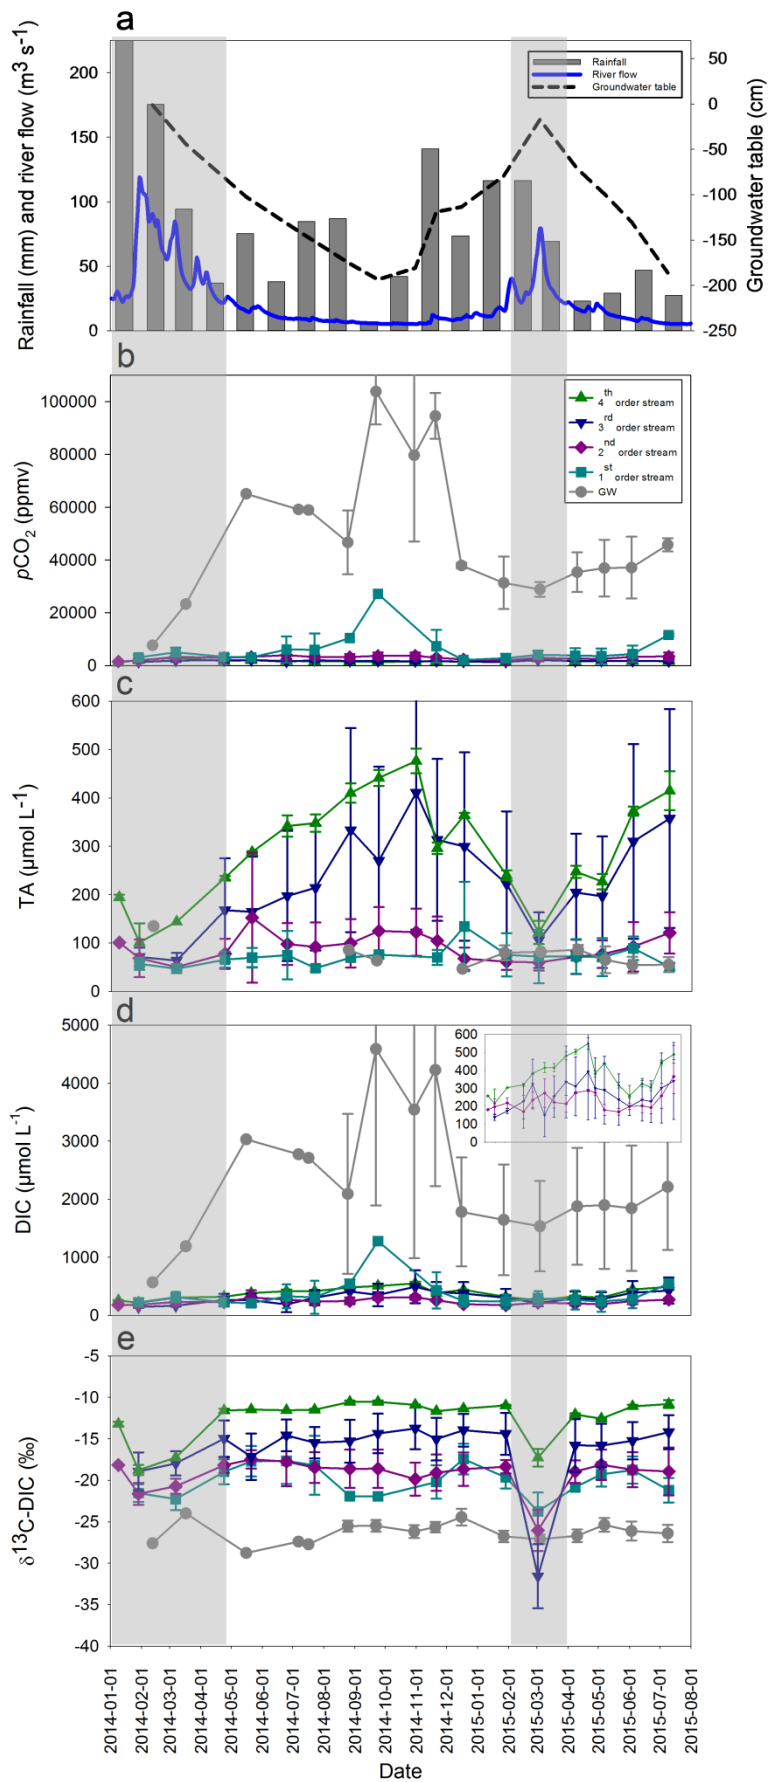

1112

1113 FIGURE 2

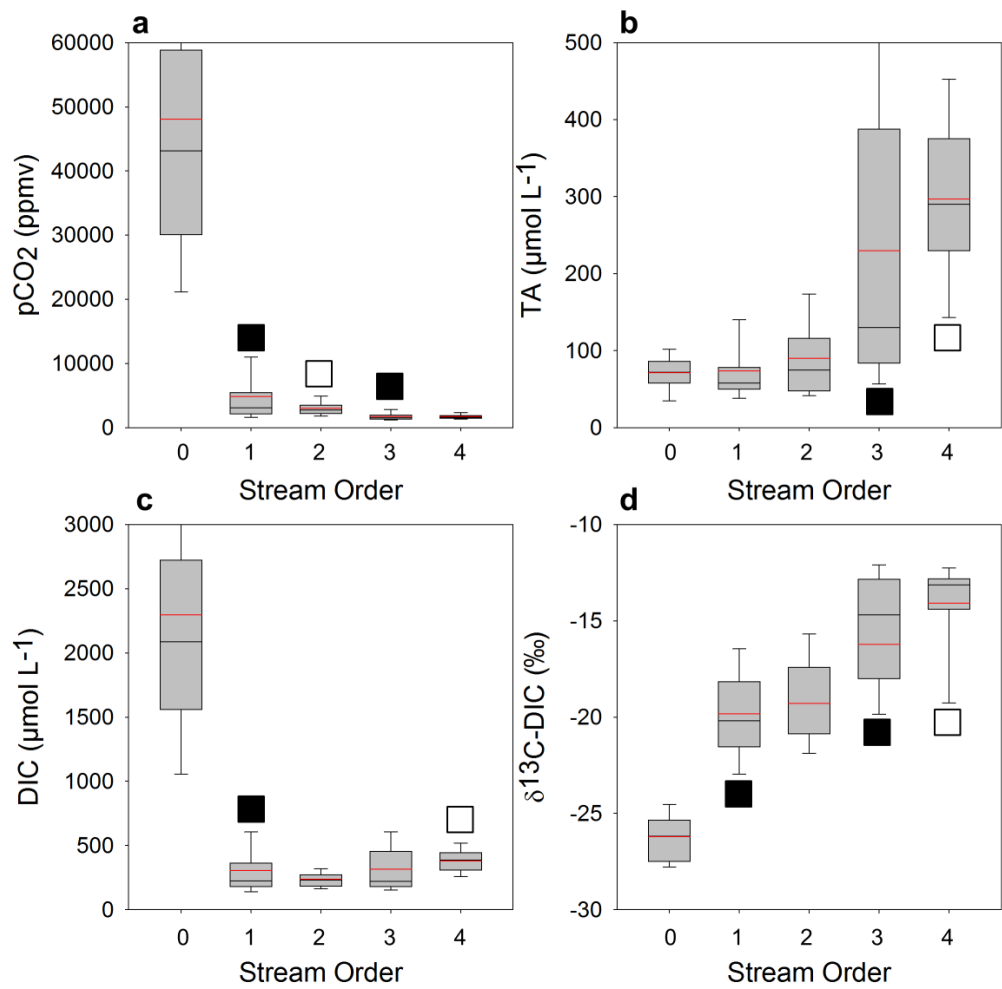

1114

1115

1116 FIGURE 3

1117

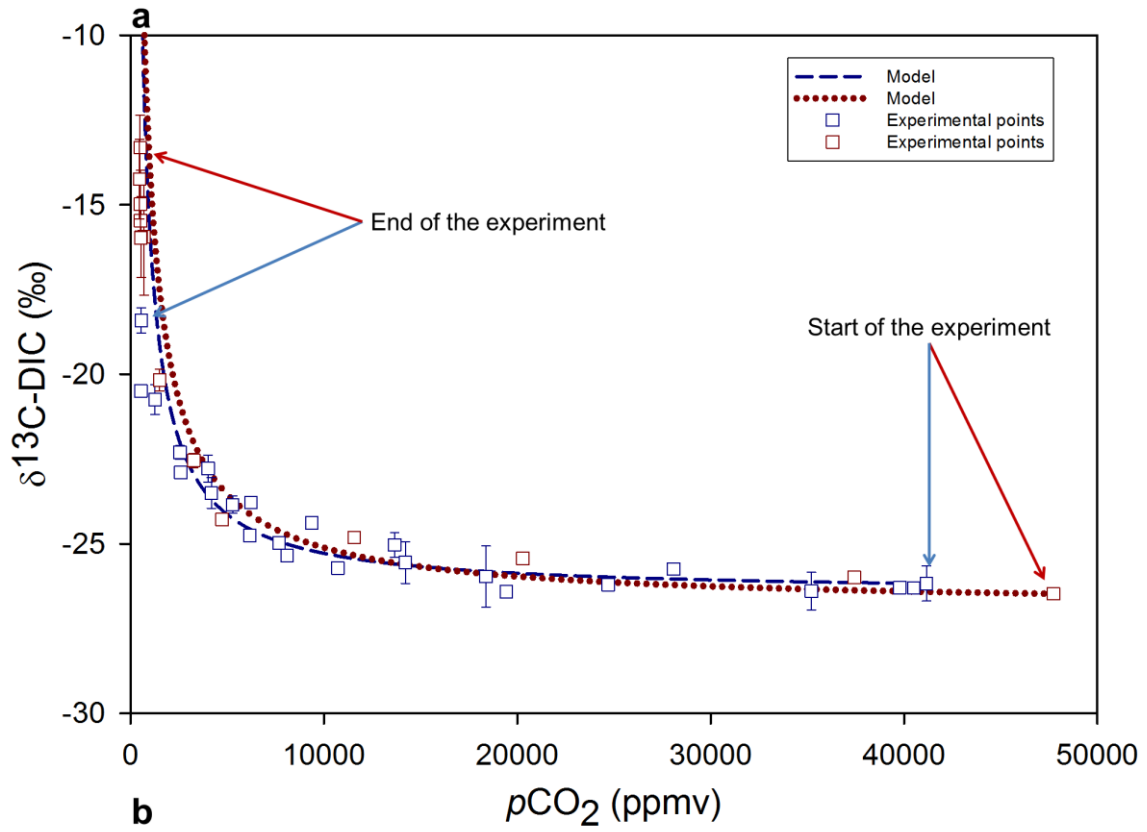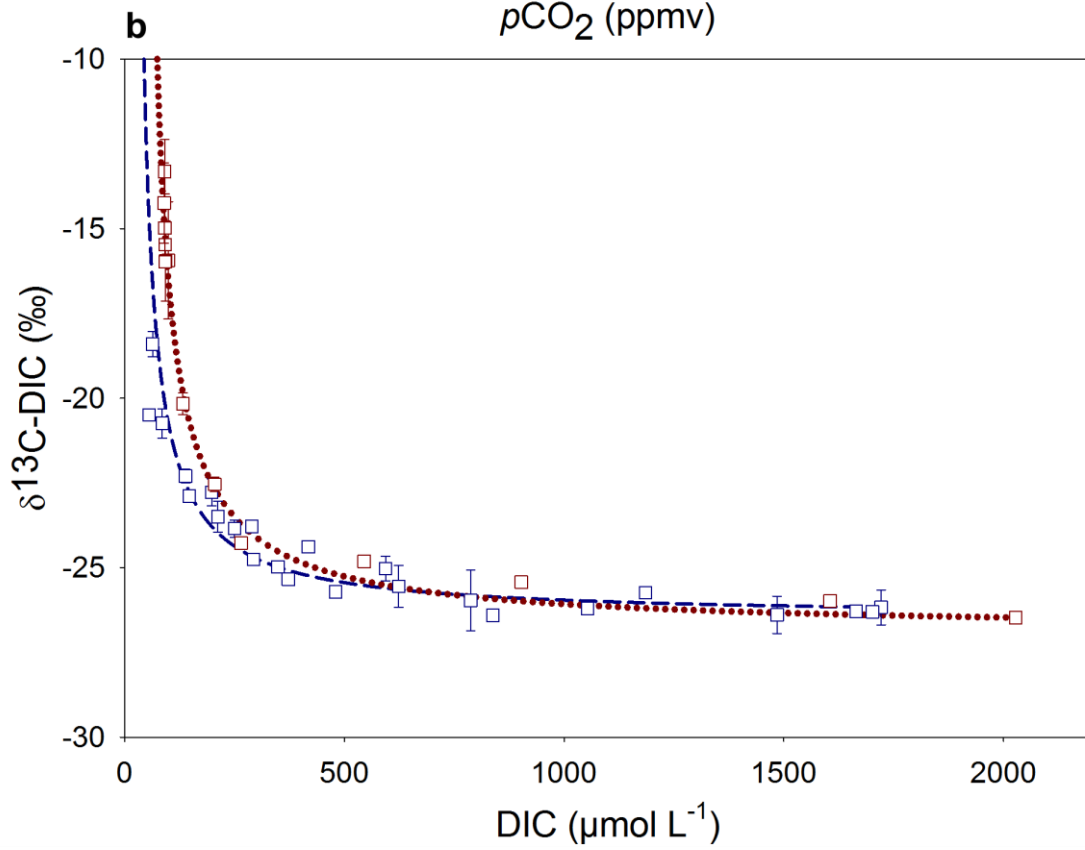

1118

1119

1120 FIGURE 4

1121



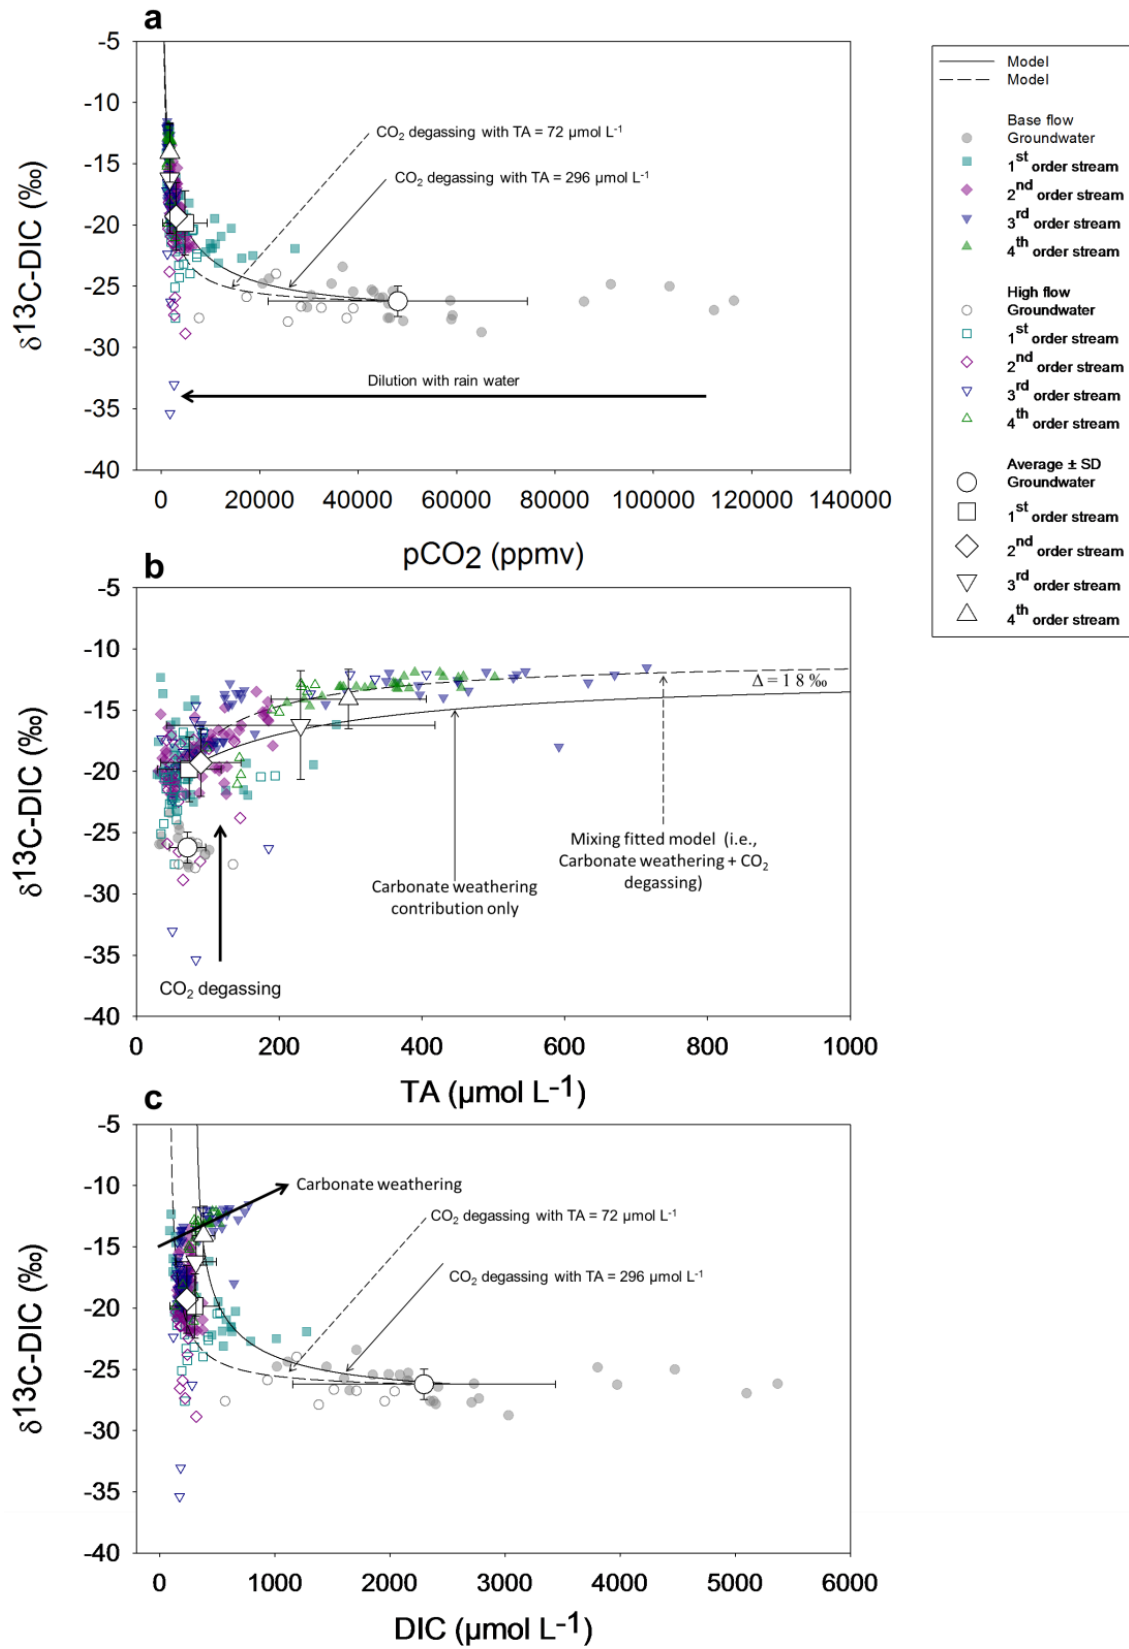

1122

1123

1124 FIGURE 5

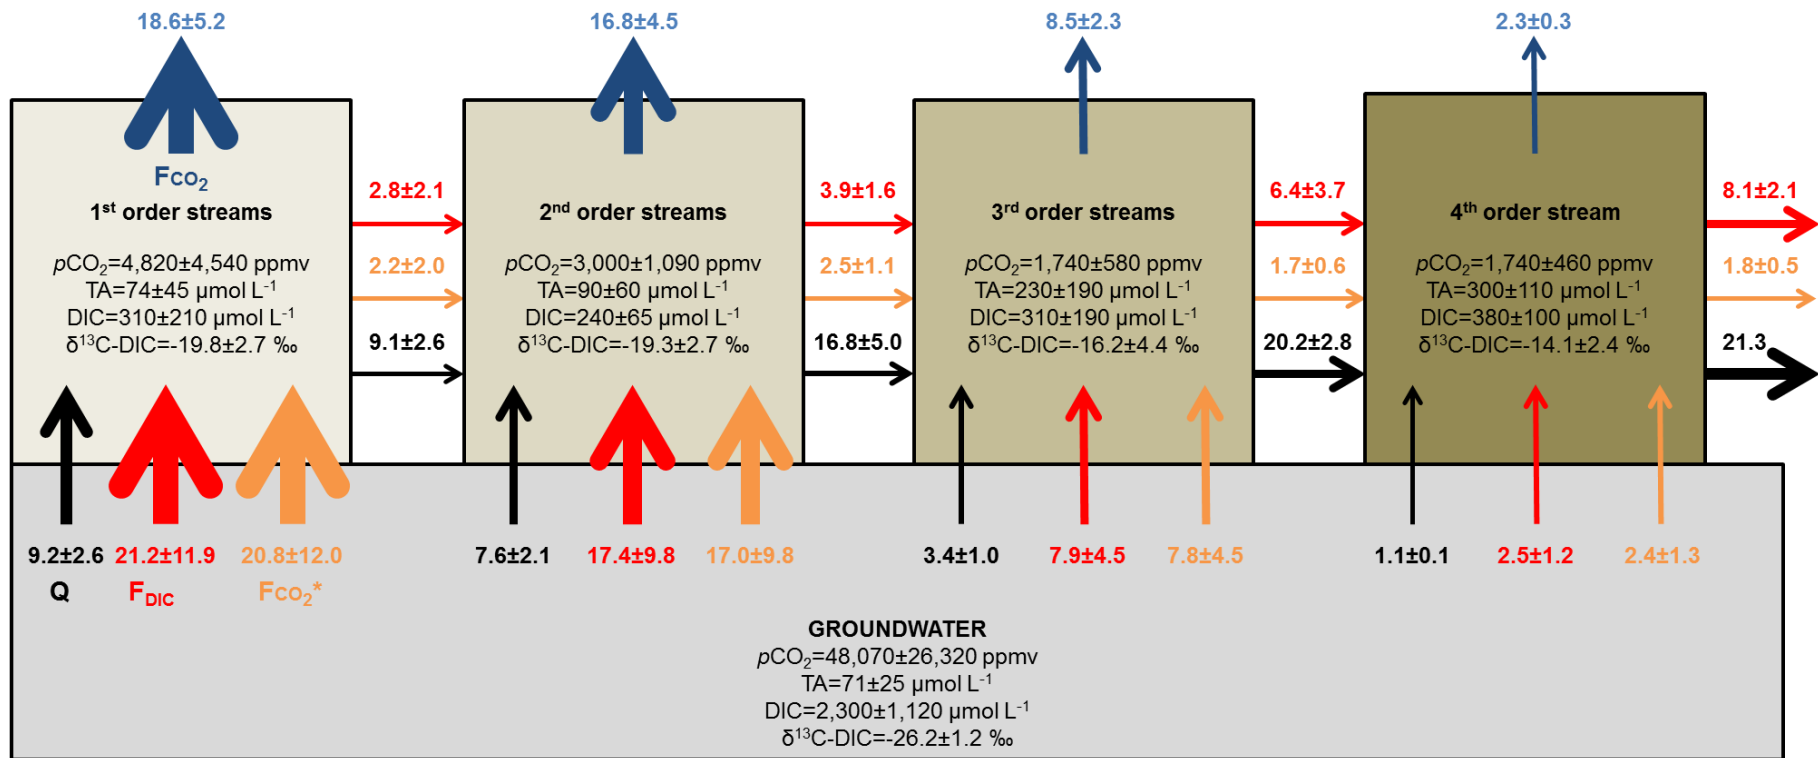

1125

1126

1127

1128 FIGURE 6
